# Supplementary material for: Large-Scale Range Collapse of Hawaiian Forest Birds under Climate Change and the Need 21st Century Conservation Options
Source: PubMed Central journal article supplement (PMC4625087; doi:10.1371/journal.pone.0140389), 2015-10-28

**Appendix S1.** Maps of habitat suitability for Hawaiian forest bird species under current and future climate.

Ensemble model suitability scores for each individual species separated between high and reduced model reliability species.

Suitability scores range from 0 to 1 and are based on a mean across models, weighted by ROC scores.

S1  
HIGH MODEL RELIABILITY SPECIES

Akekee baseline modeled suitability

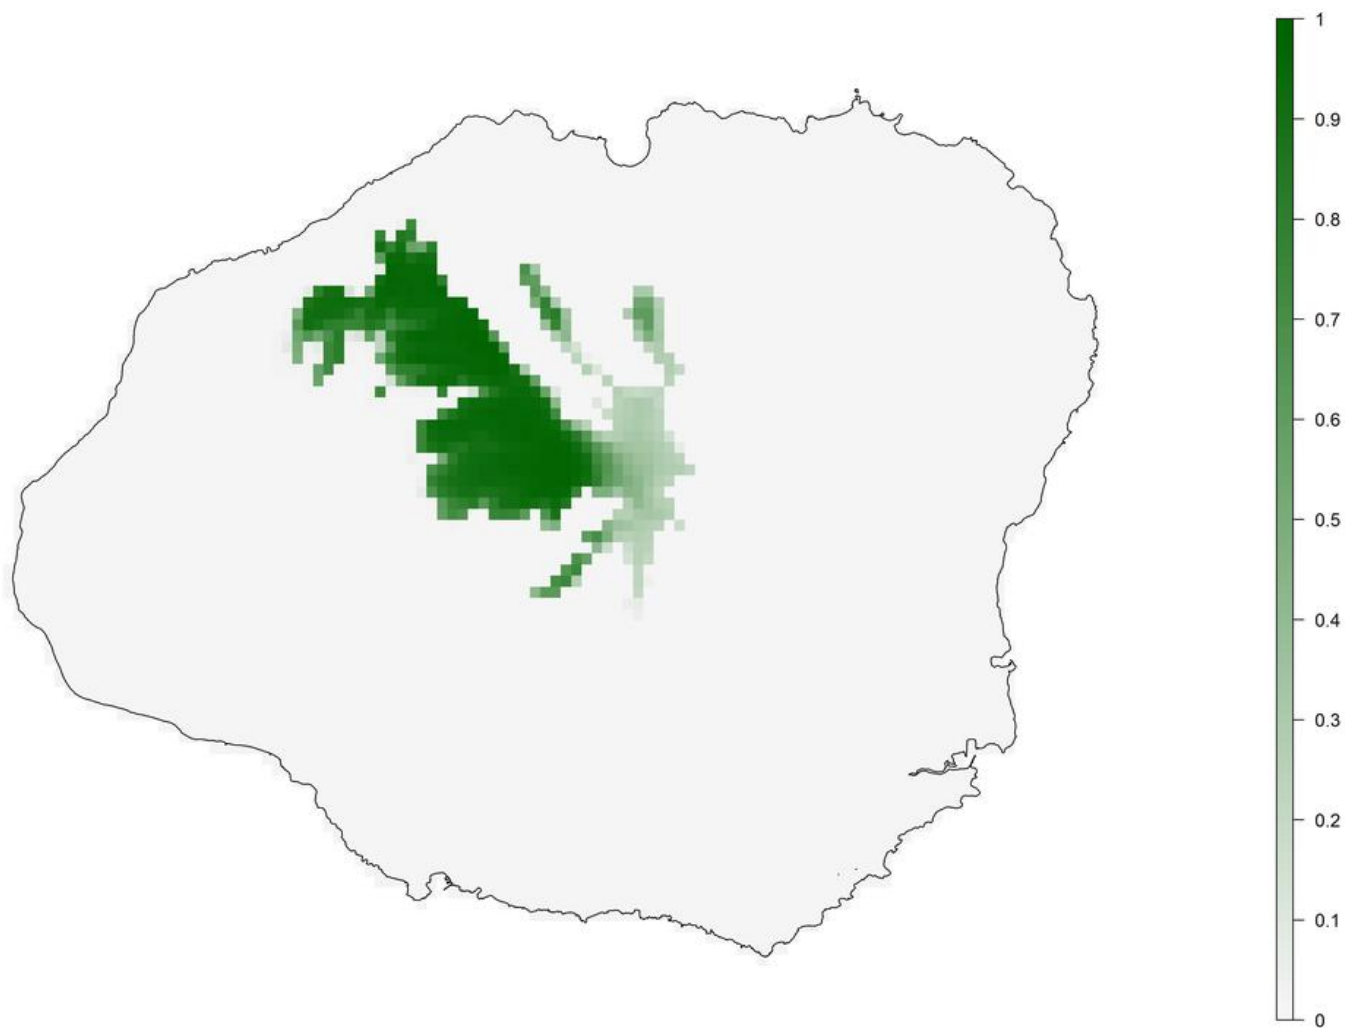

S1  
HIGH MODEL RELIABILITY SPECIES

Akekee future modeled suitability

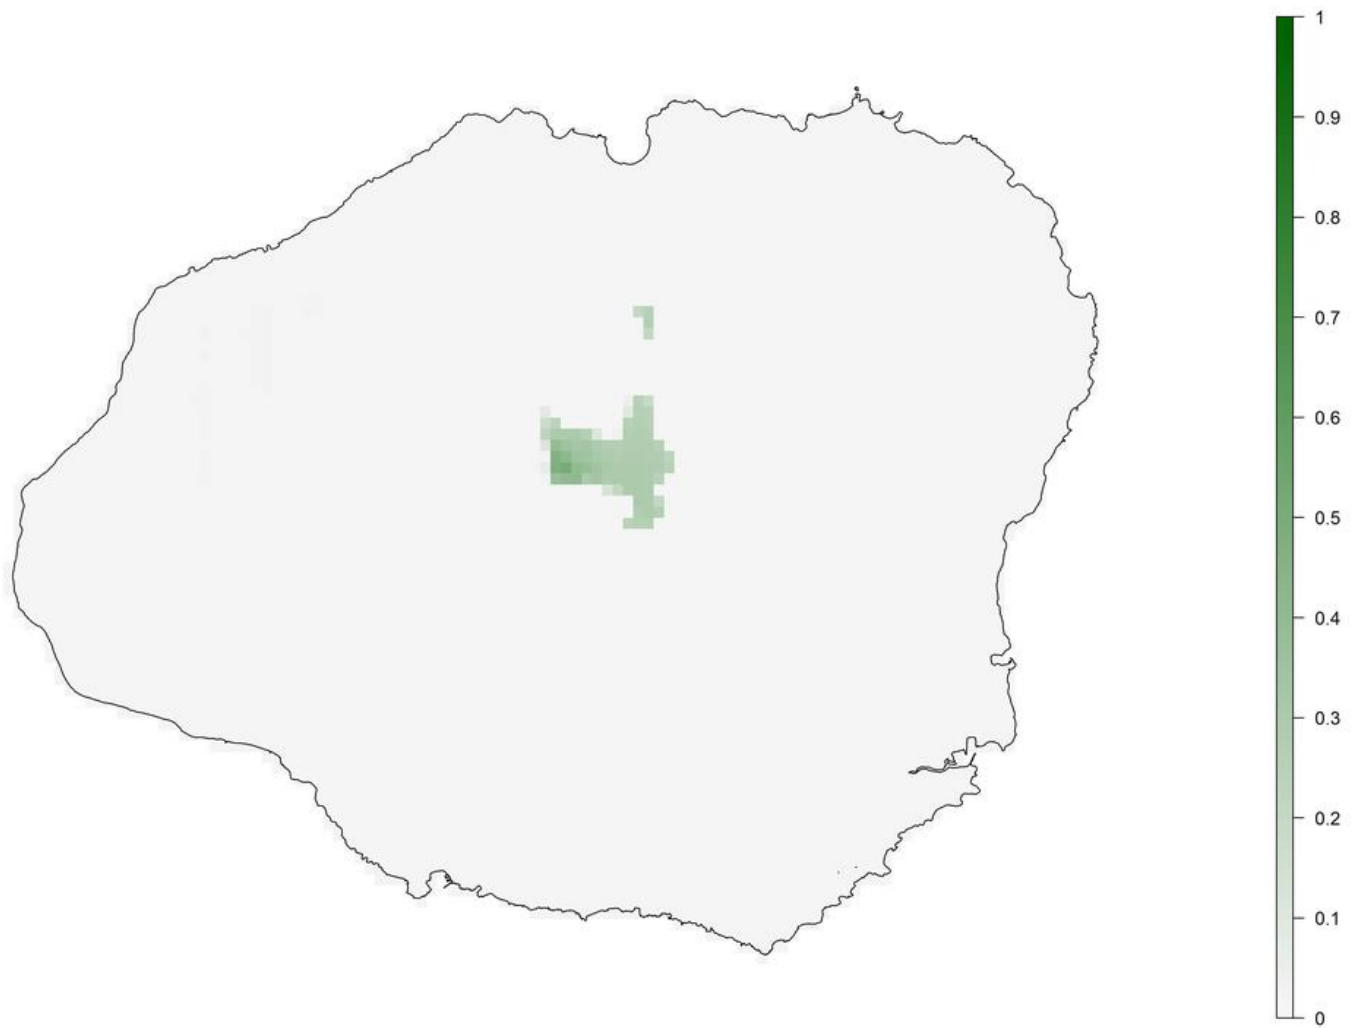

S1  
HIGH MODEL RELIABILITY SPECIES  
Akiapolau baseline modeled suitability

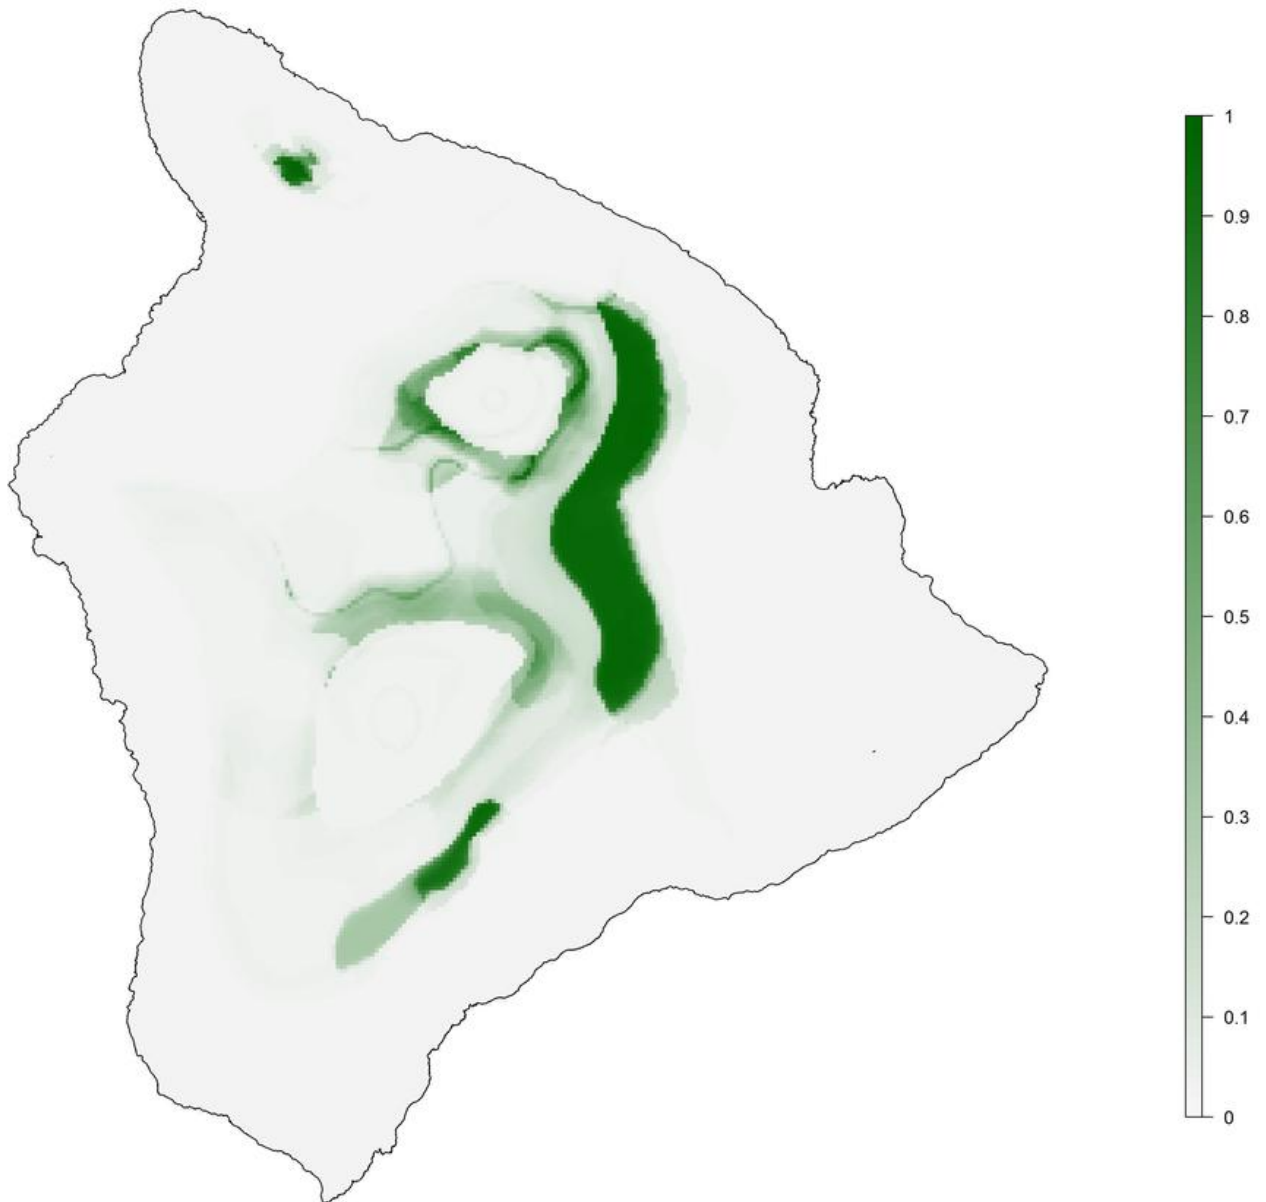

S1  
HIGH MODEL RELIABILITY SPECIES

Akiapolau future modeled suitability

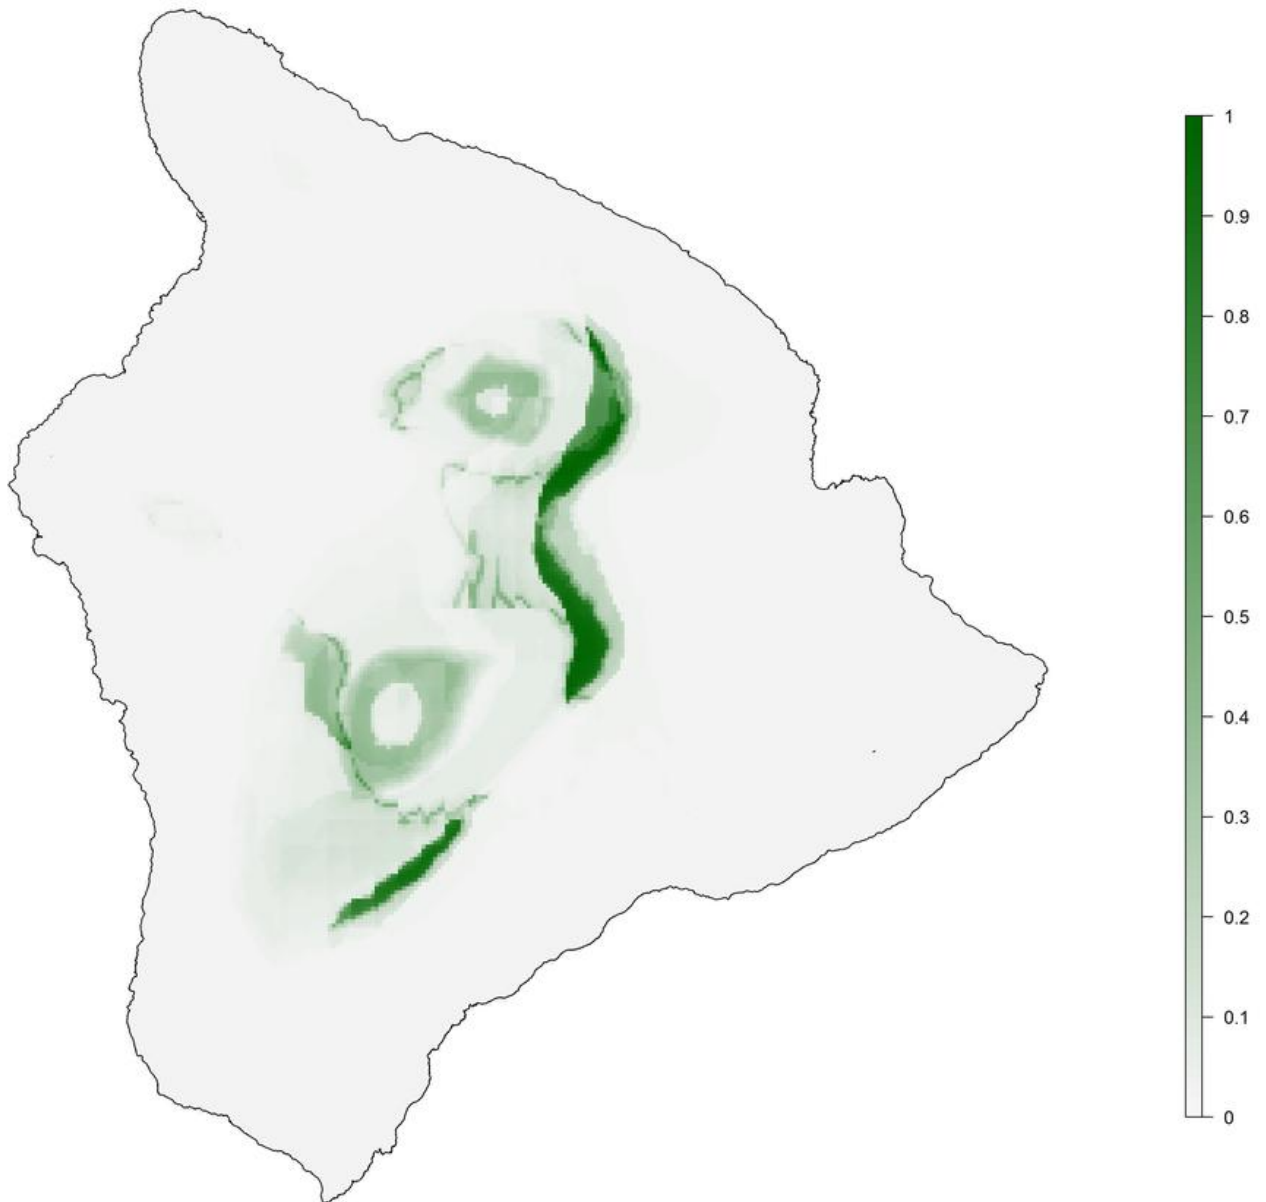

S1  
HIGH MODEL RELIABILITY SPECIES

Akikiki baseline modeled suitability

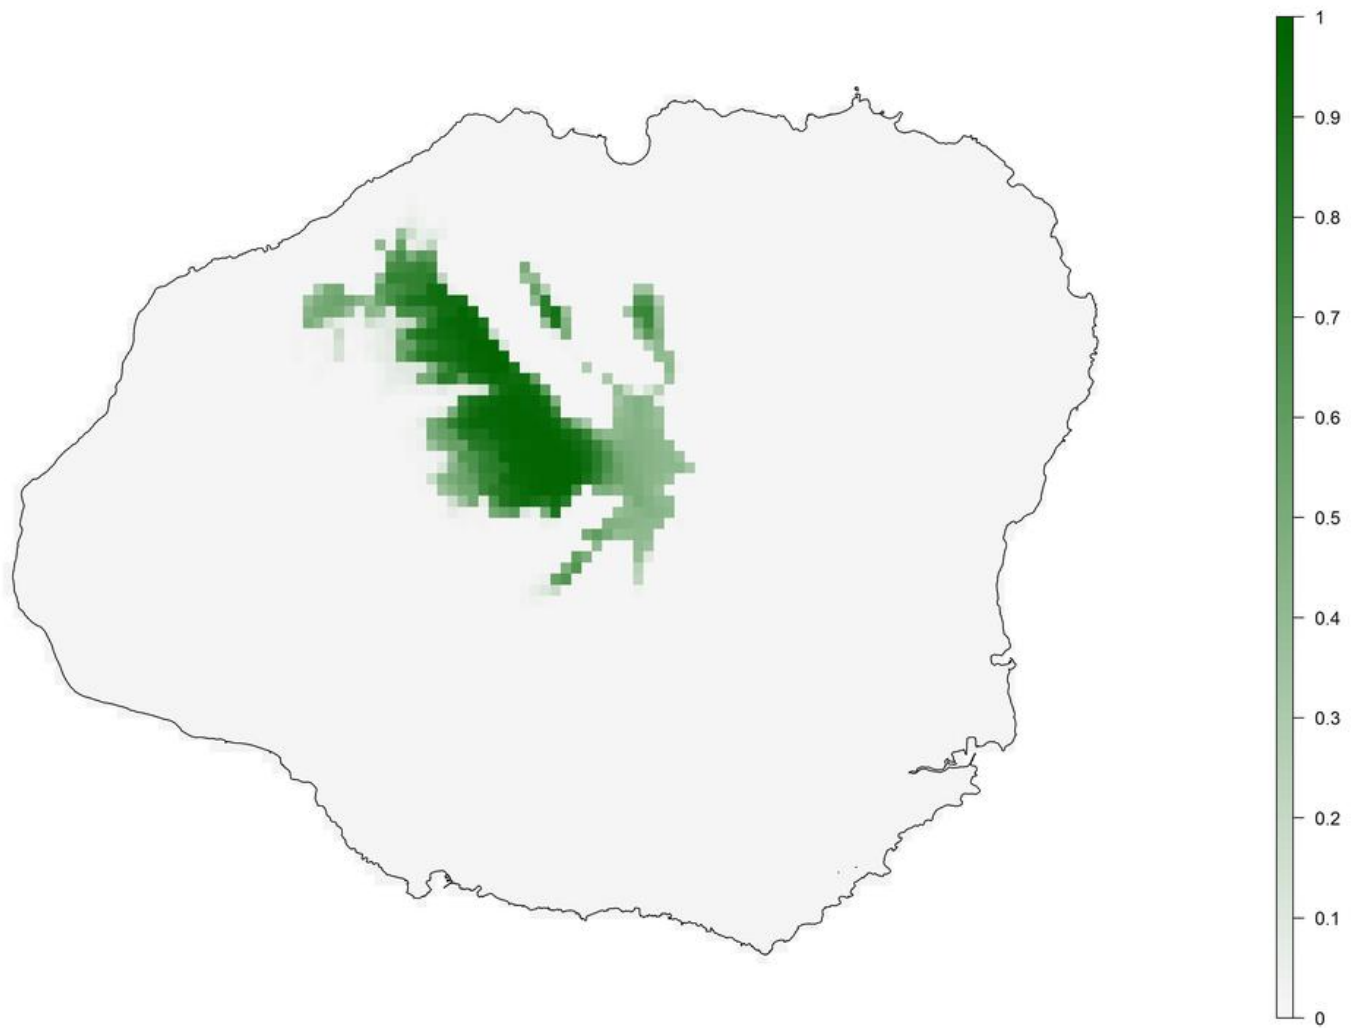

S1  
HIGH MODEL RELIABILITY SPECIES

Akikiki future modeled suitability

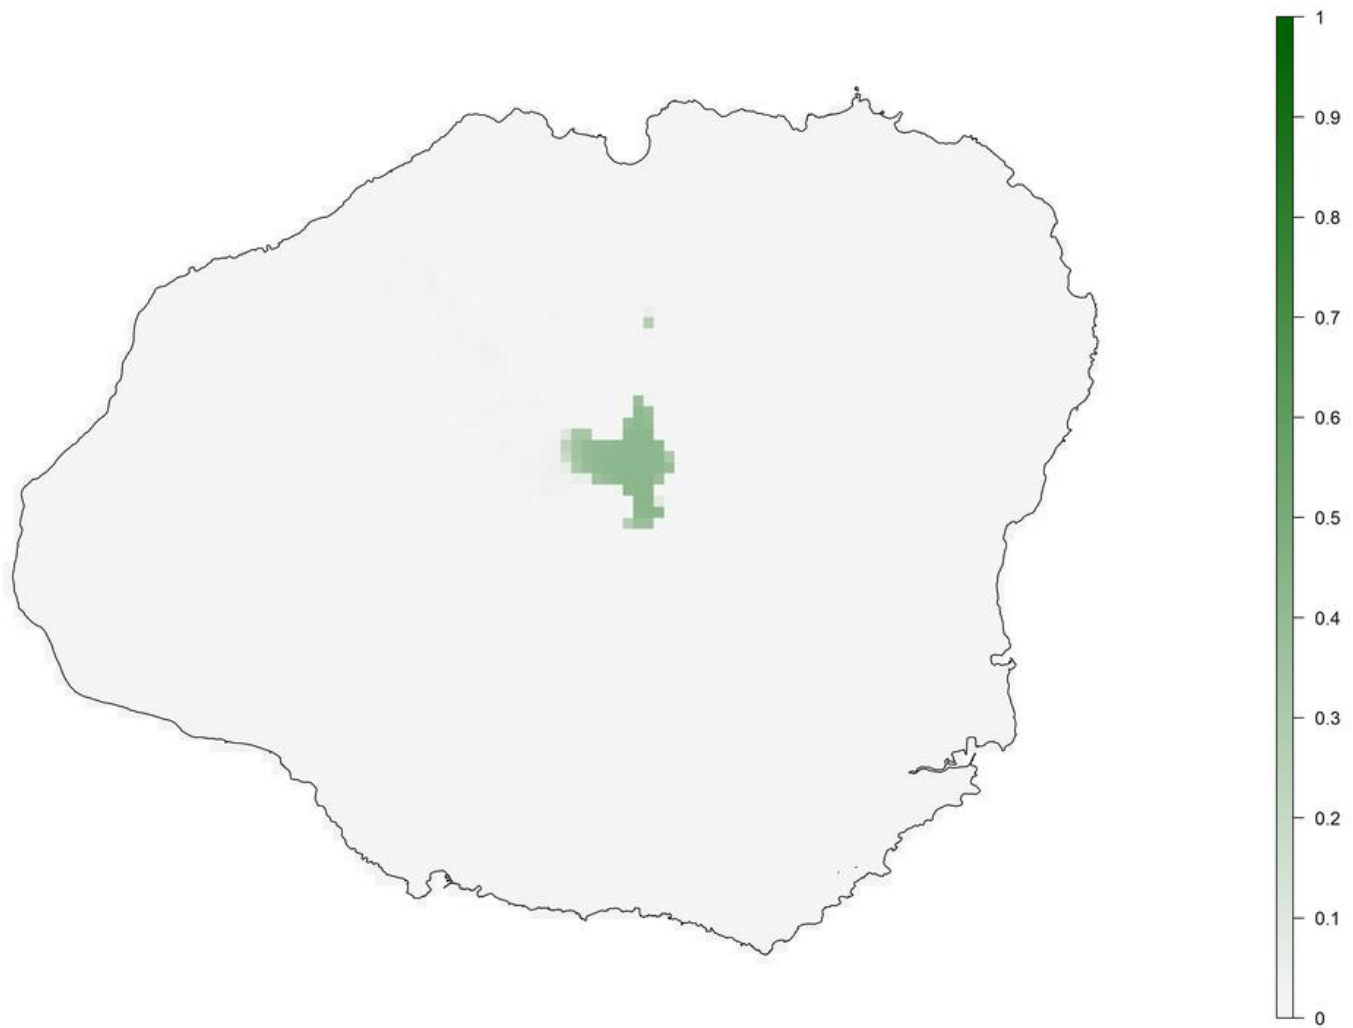

S1  
HIGH MODEL RELIABILITY SPECIES  
Akohekohe baseline modeled suitability

7.

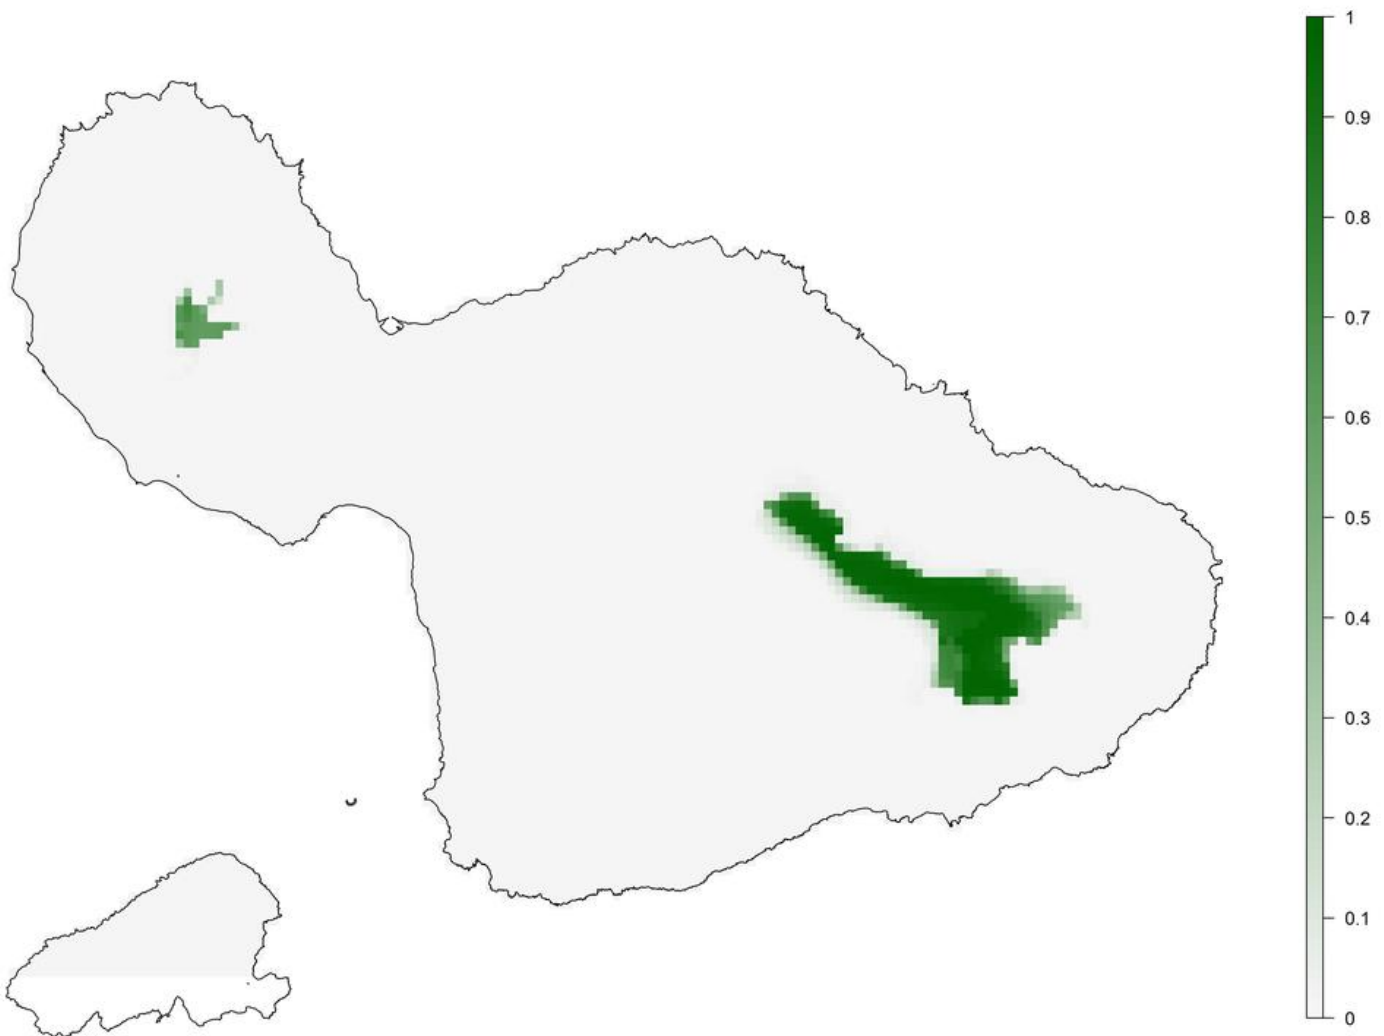



S1  
HIGH MODEL RELIABILITY SPECIES  
Akohekohe future modeled suitability

7.

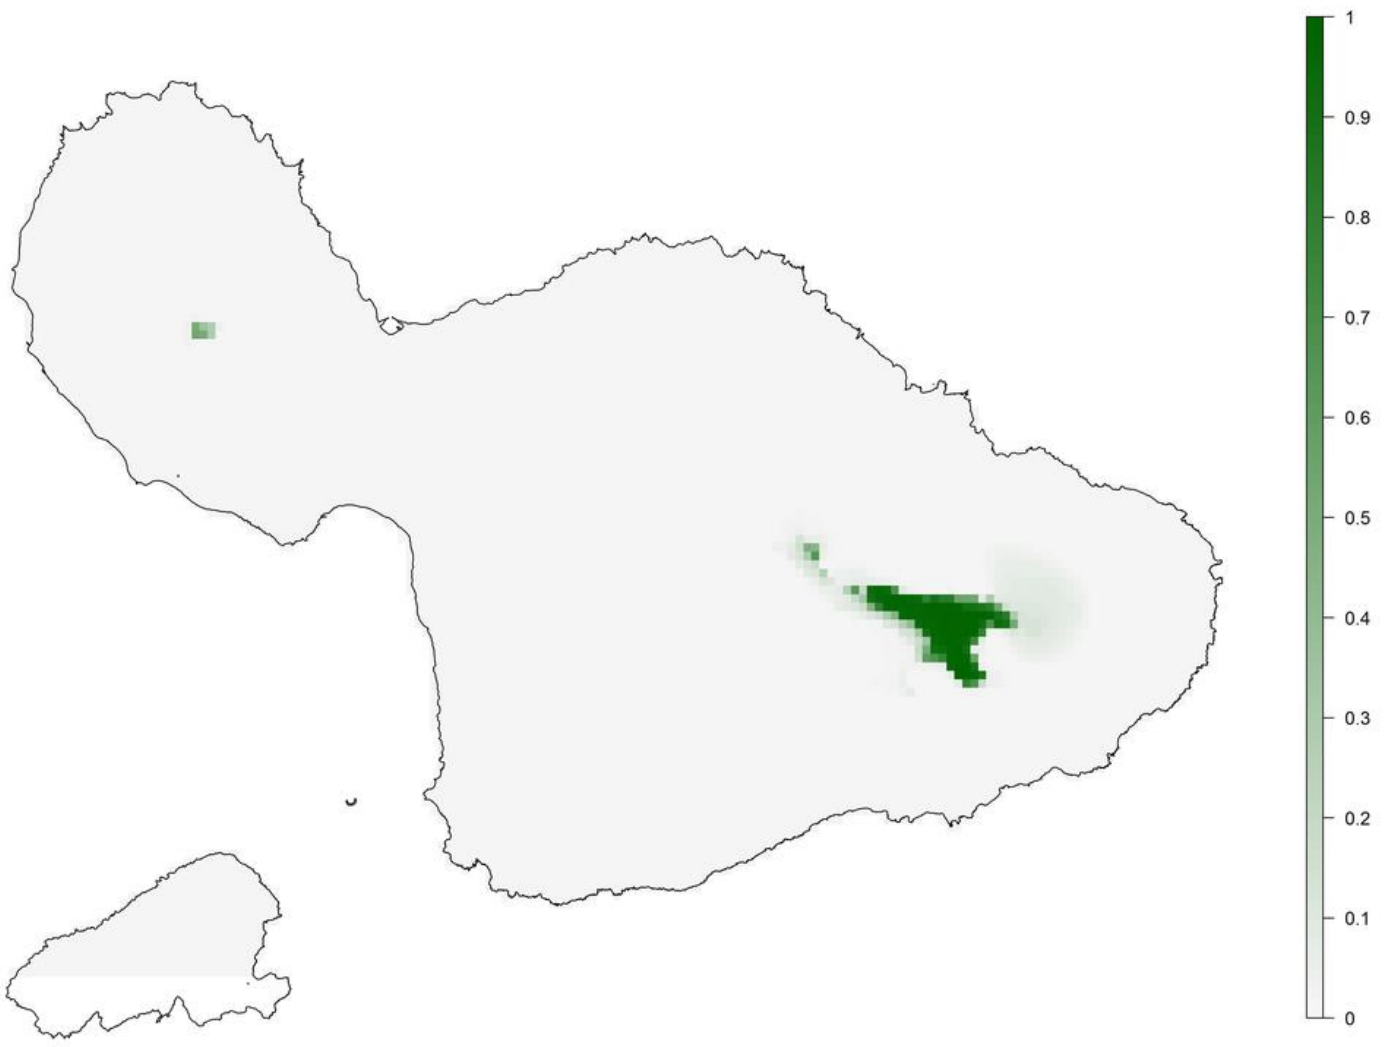

S1  
HIGH MODEL RELIABILITY SPECIES  
Hawaii Akepa baseline modeled suitability

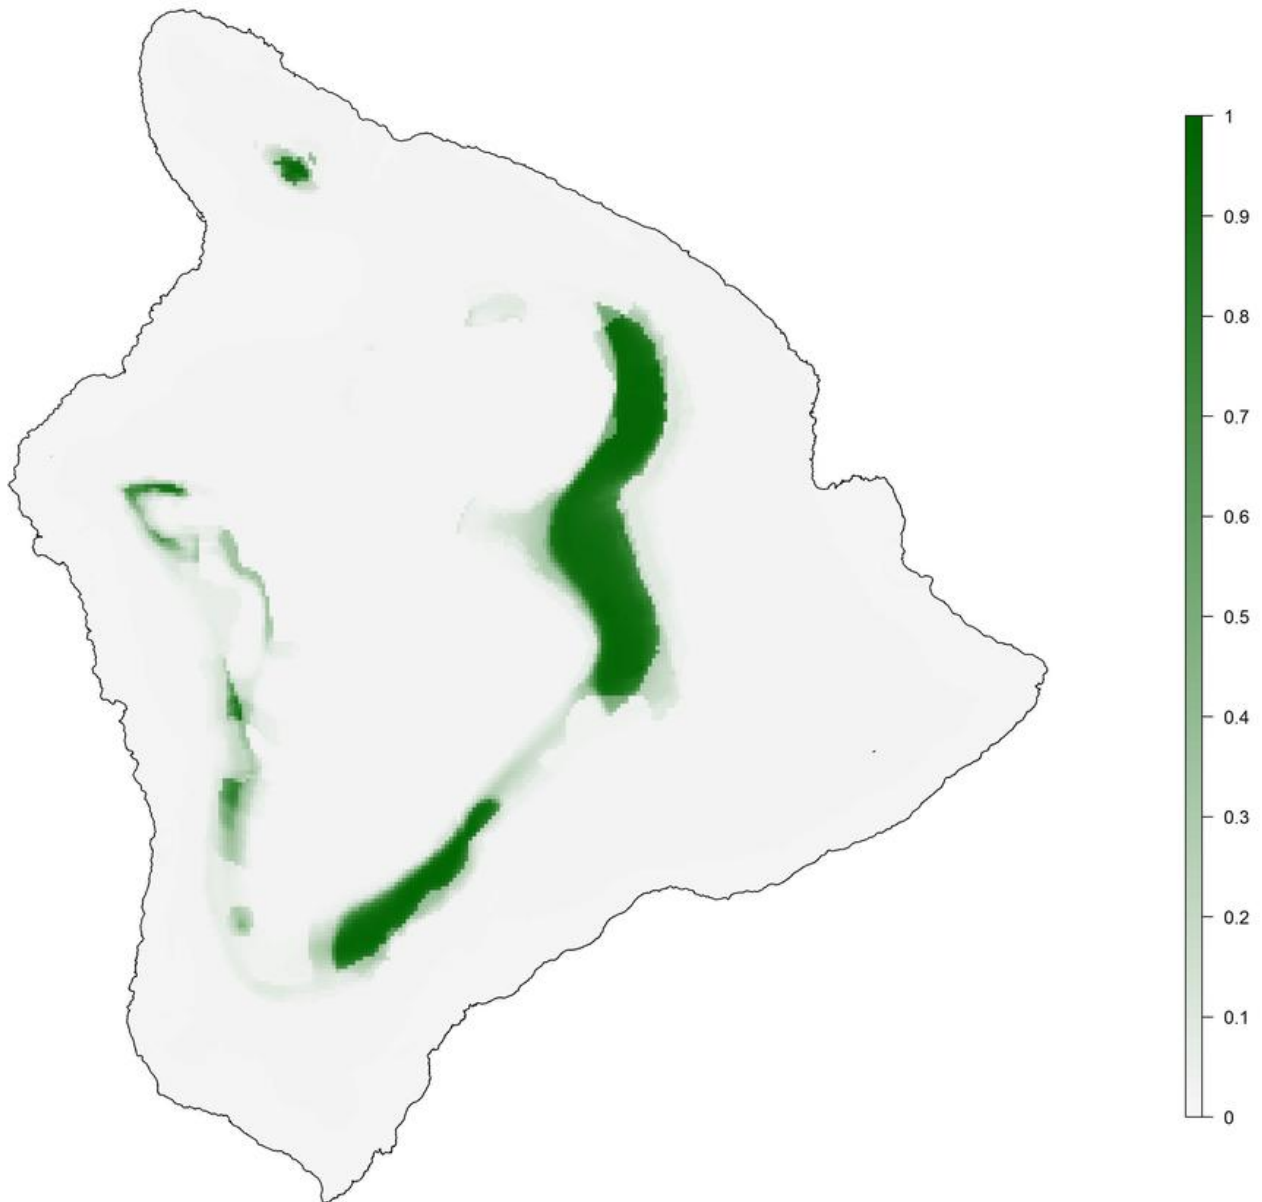

S1  
HIGH MODEL RELIABILITY SPECIES  
Hawaii Akepa future modeled suitability

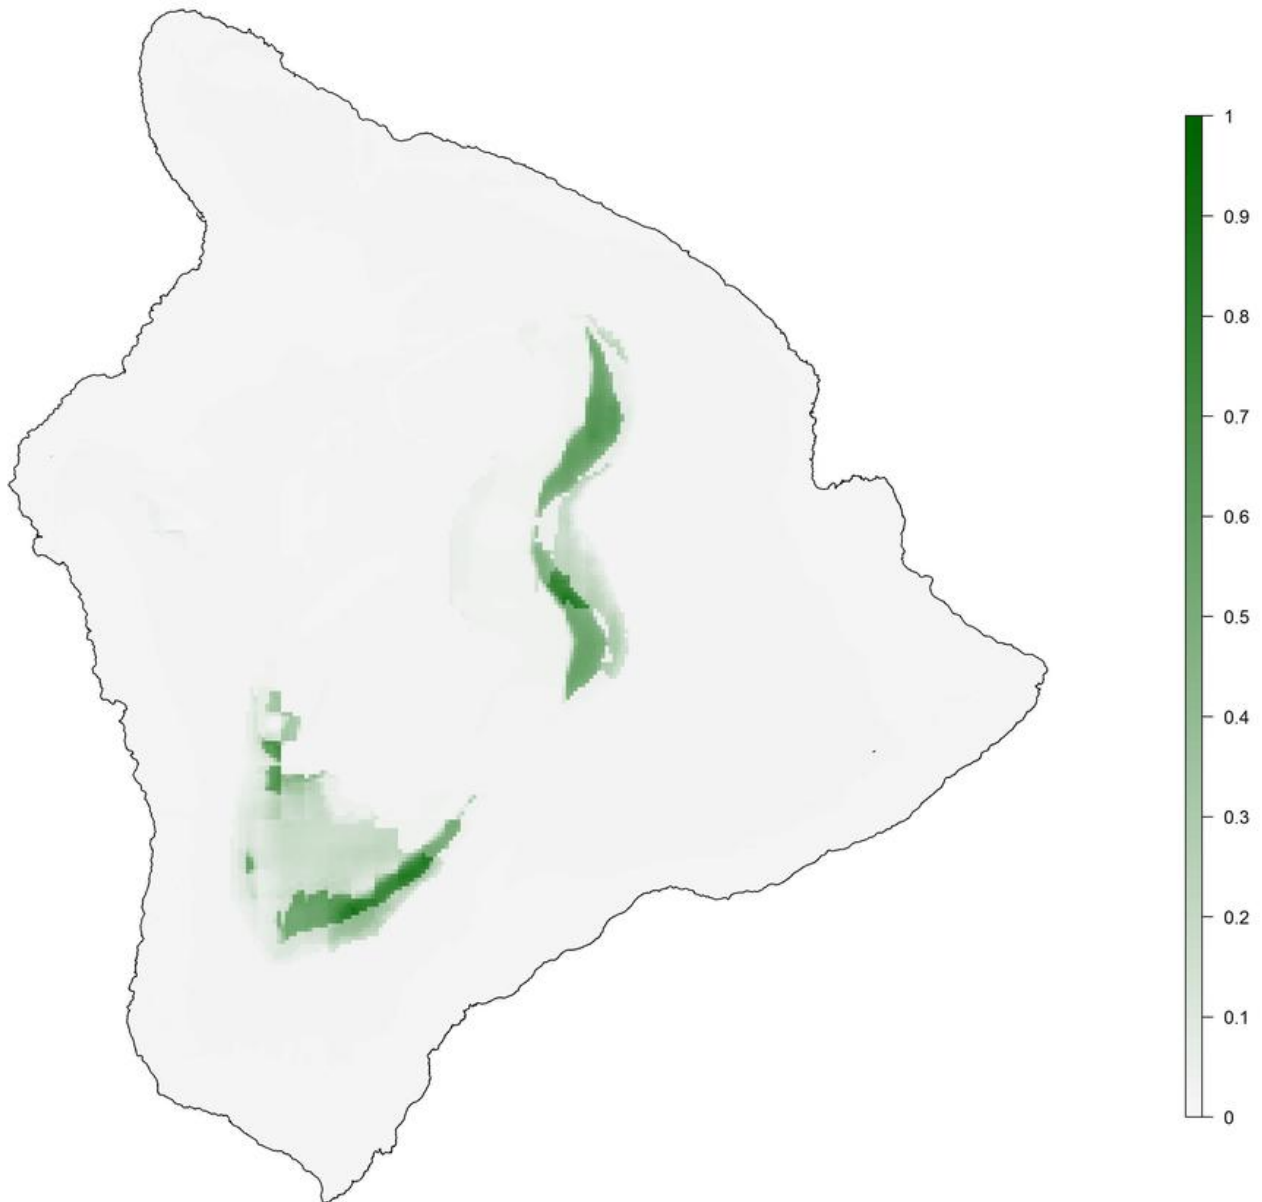

S1  
HIGH MODEL RELIABILITY SPECIES  
Hawaii Creeper baseline modeled suitability

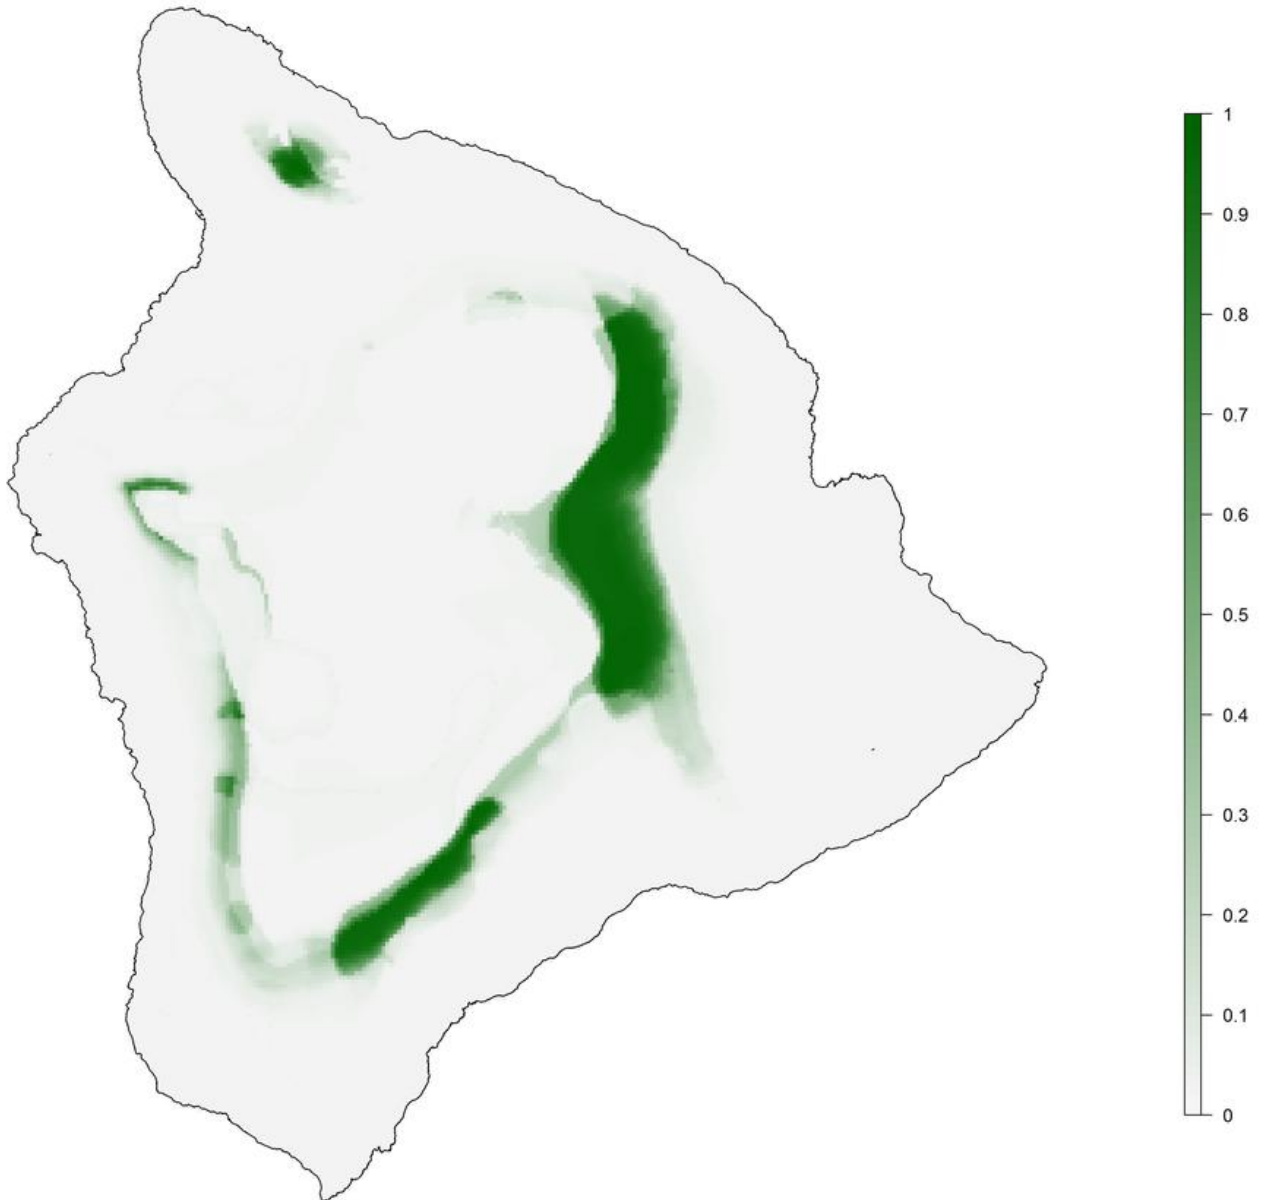

S1  
HIGH MODEL RELIABILITY SPECIES  
Hawaii Creeper future modeled suitability

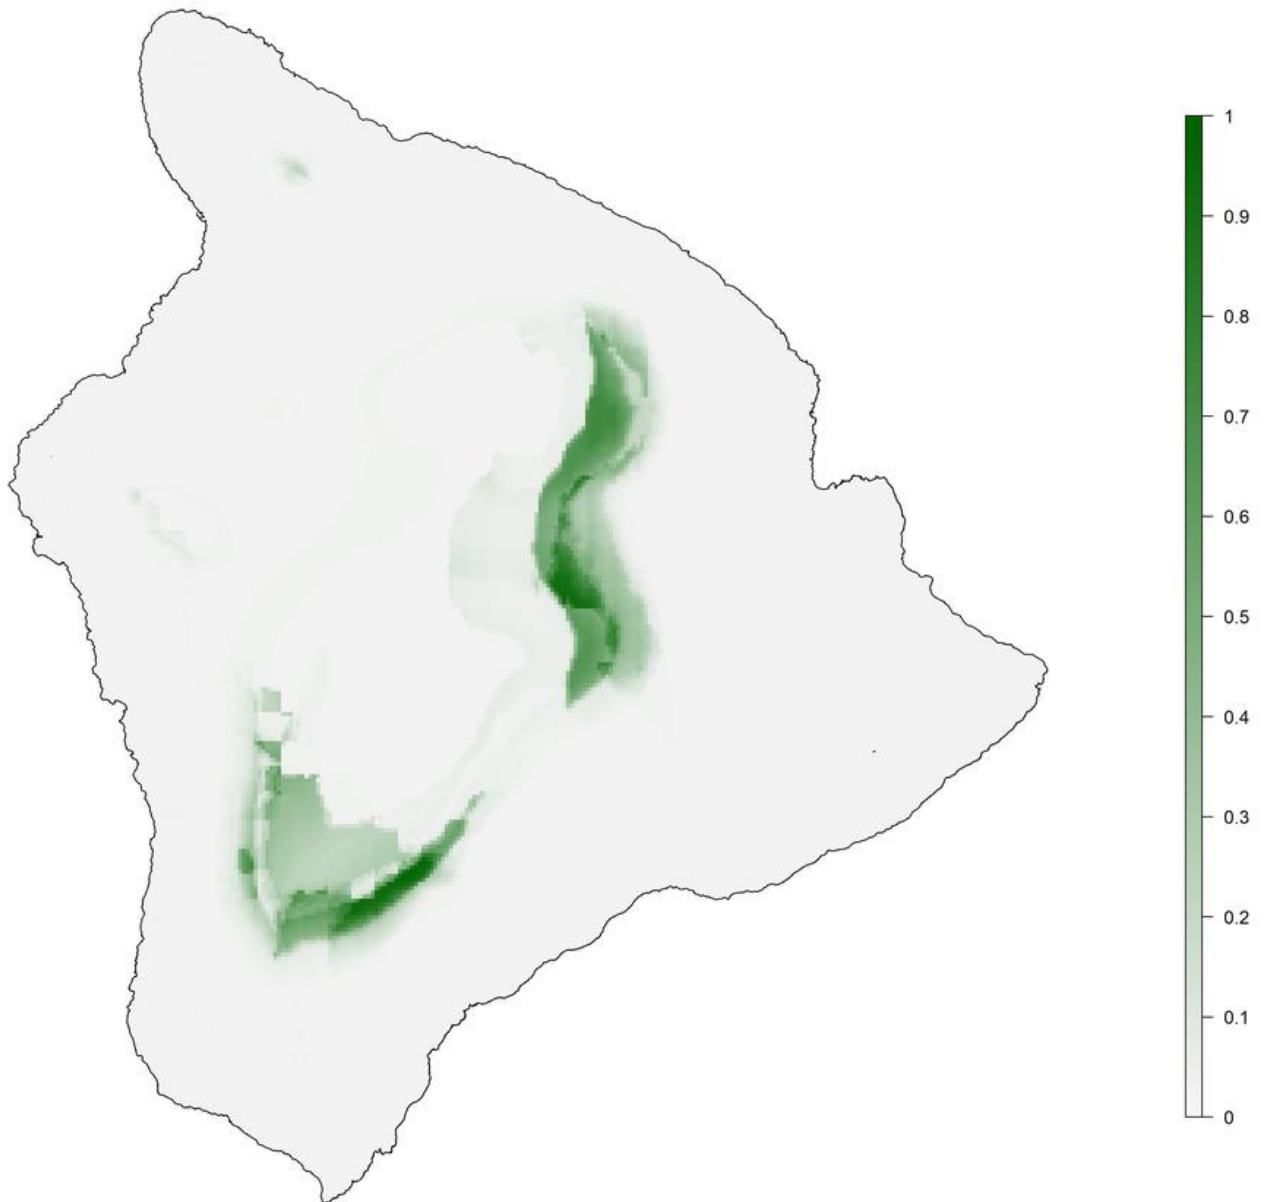

S1  
HIGH MODEL RELIABILITY SPECIES

liwi baseline modeled suitability

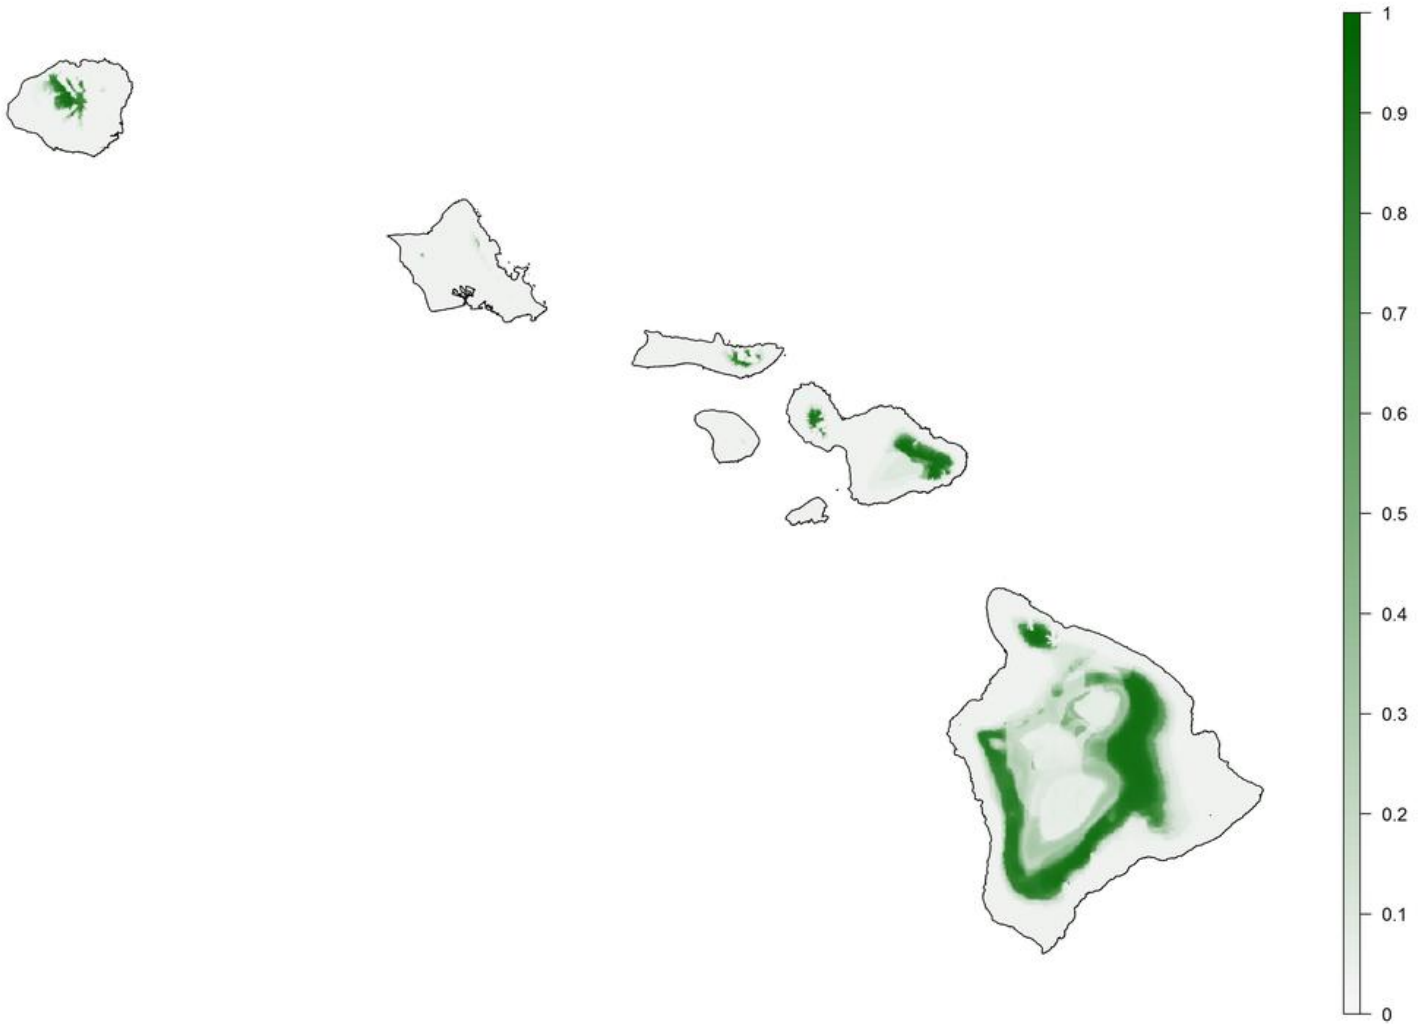

S1  
HIGH MODEL RELIABILITY SPECIES

liwi future modeled suitability

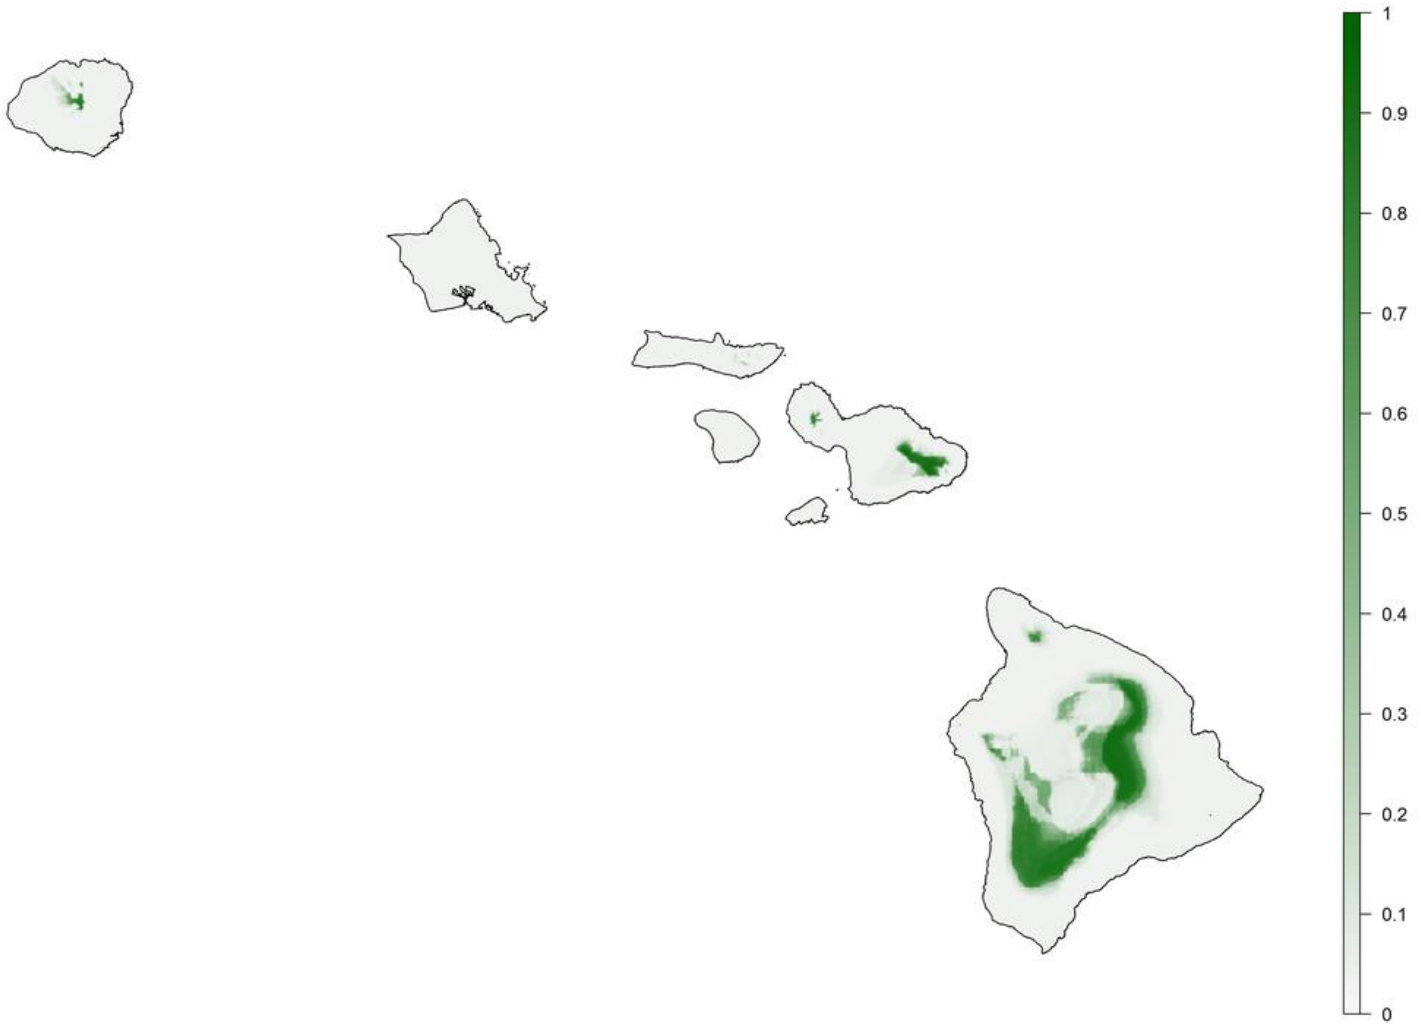

S1  
HIGH MODEL RELIABILITY SPECIES  
Maui Alauahio baseline modeled suitability

7.

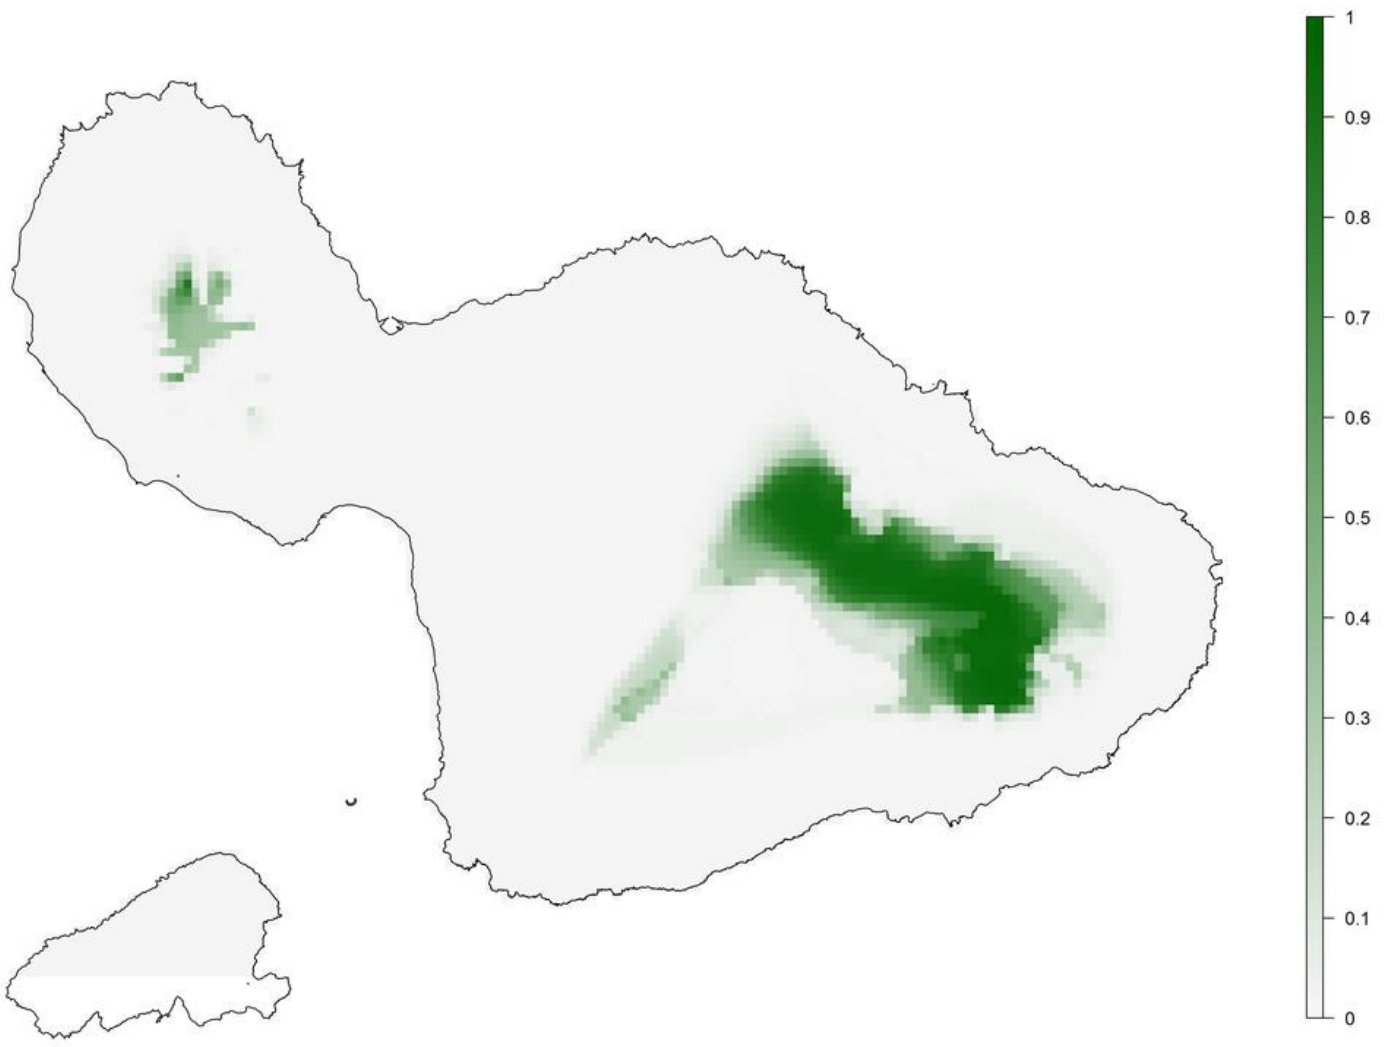



S1  
HIGH MODEL RELIABILITY SPECIES  
Maui Alauahio future modeled suitability

7.

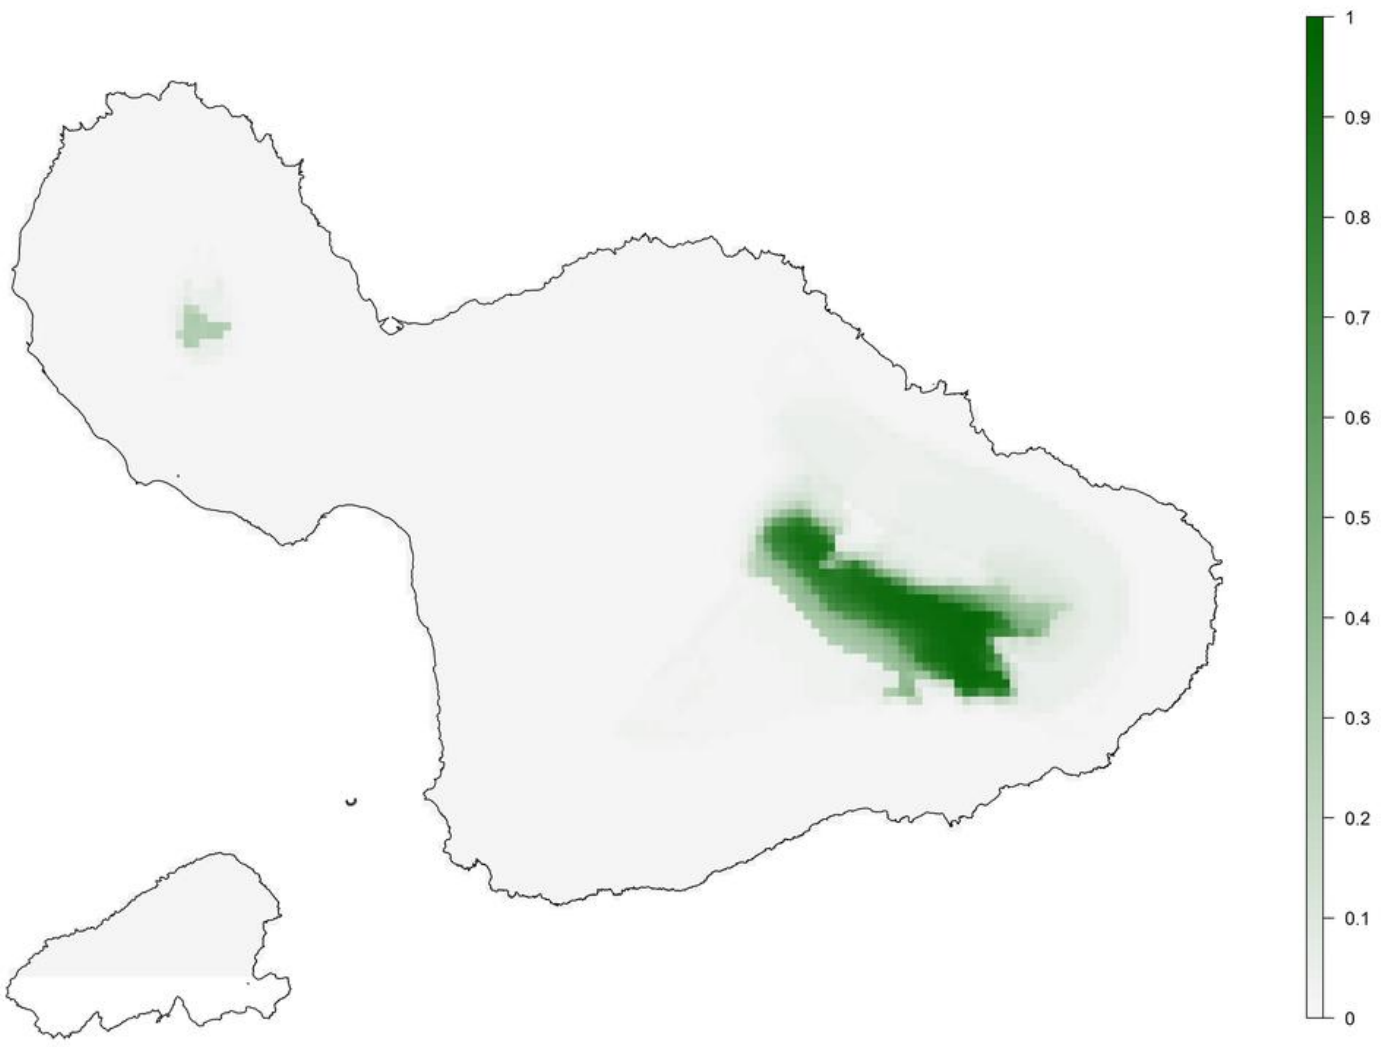

S1  
HIGH MODEL RELIABILITY SPECIES  
Maui Parrotbill baseline modeled suitability

7.

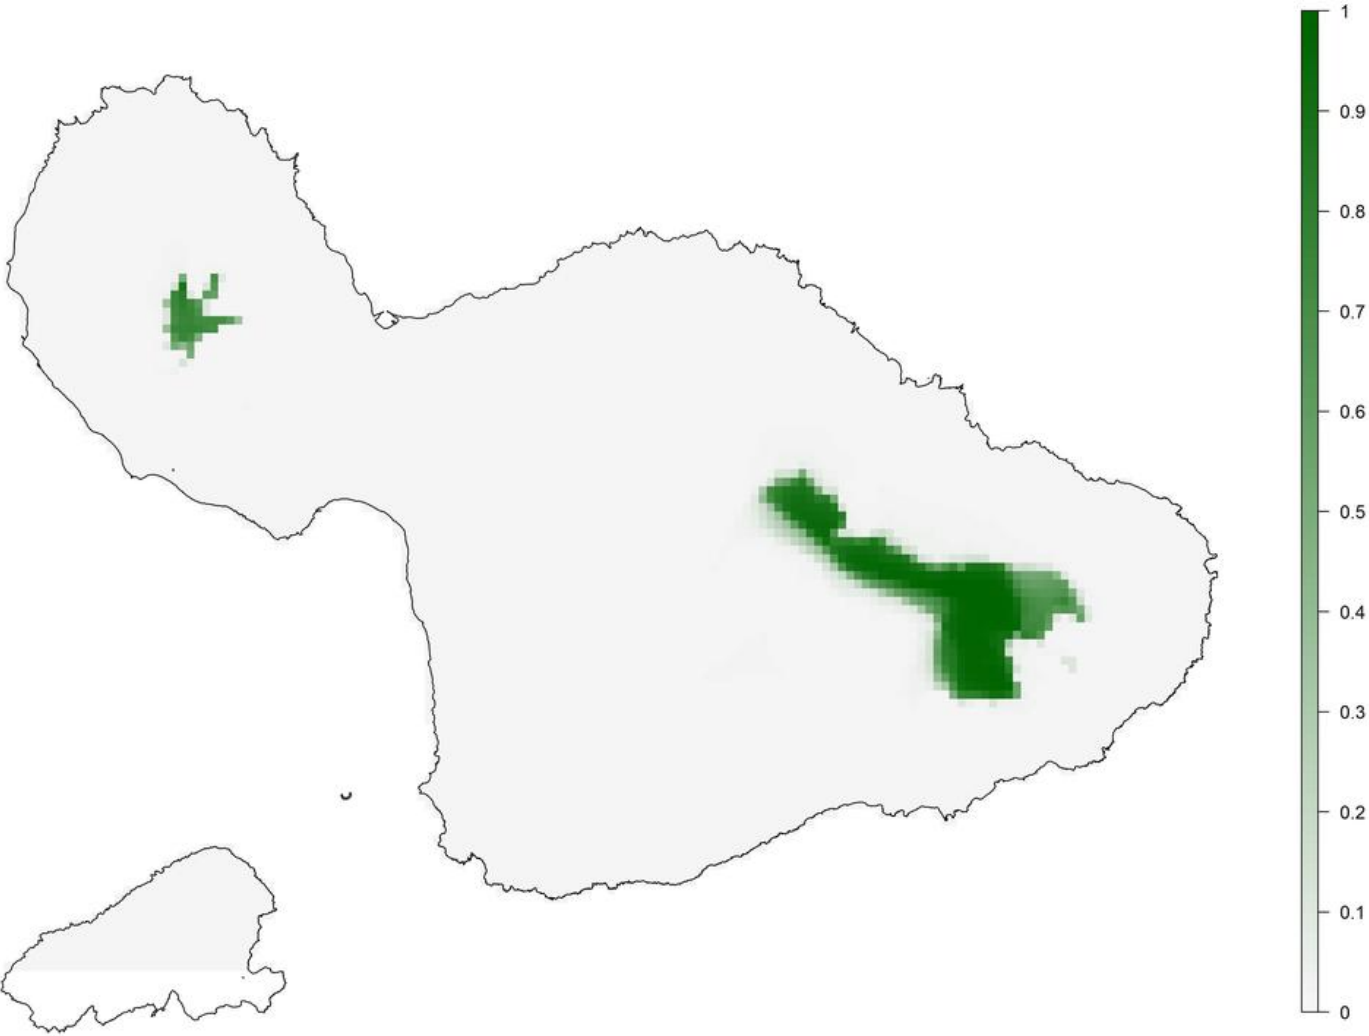

S1  
HIGH MODEL RELIABILITY SPECIES  
Maui Parrotbill future modeled suitability

7.

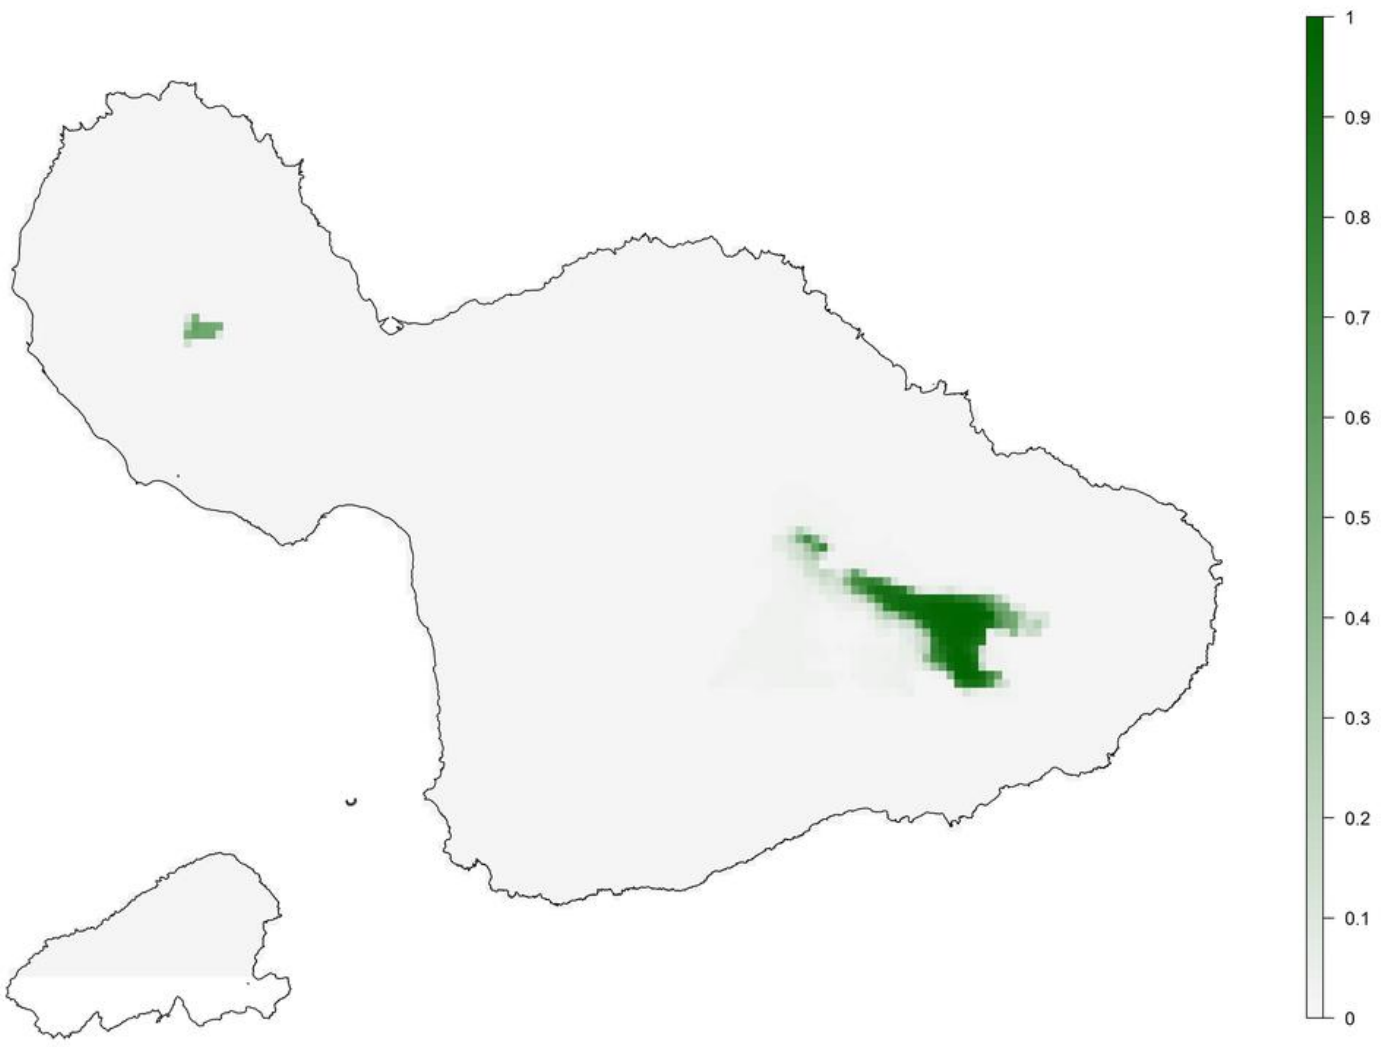

S1  
HIGH MODEL RELIABILITY SPECIES

Puaiohi baseline modeled suitability

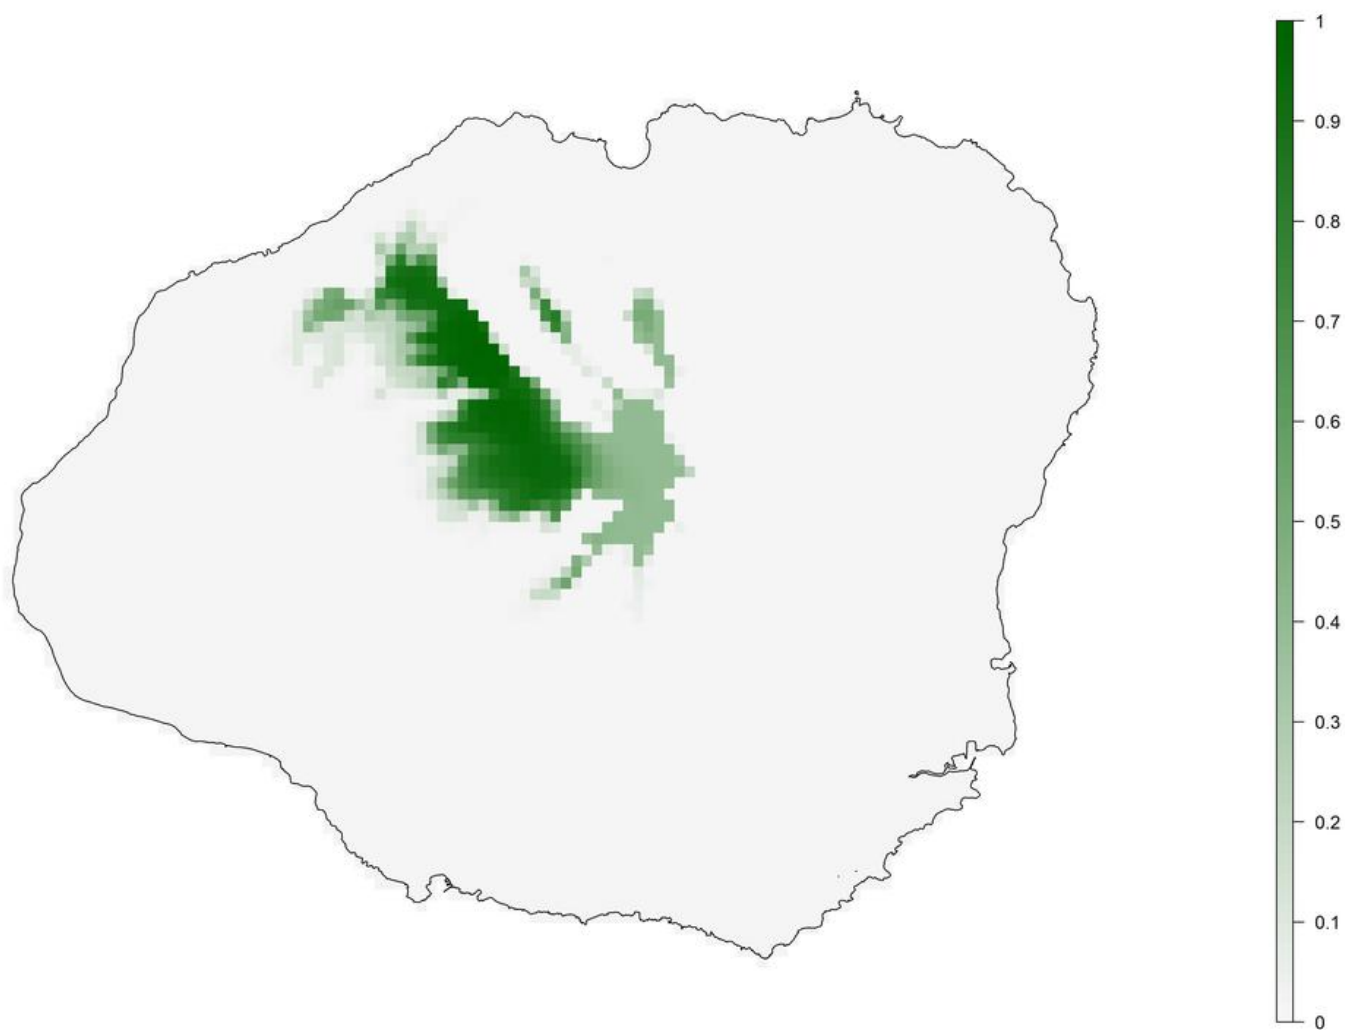

S1  
HIGH MODEL RELIABILITY SPECIES

Puaiohi future modeled suitability

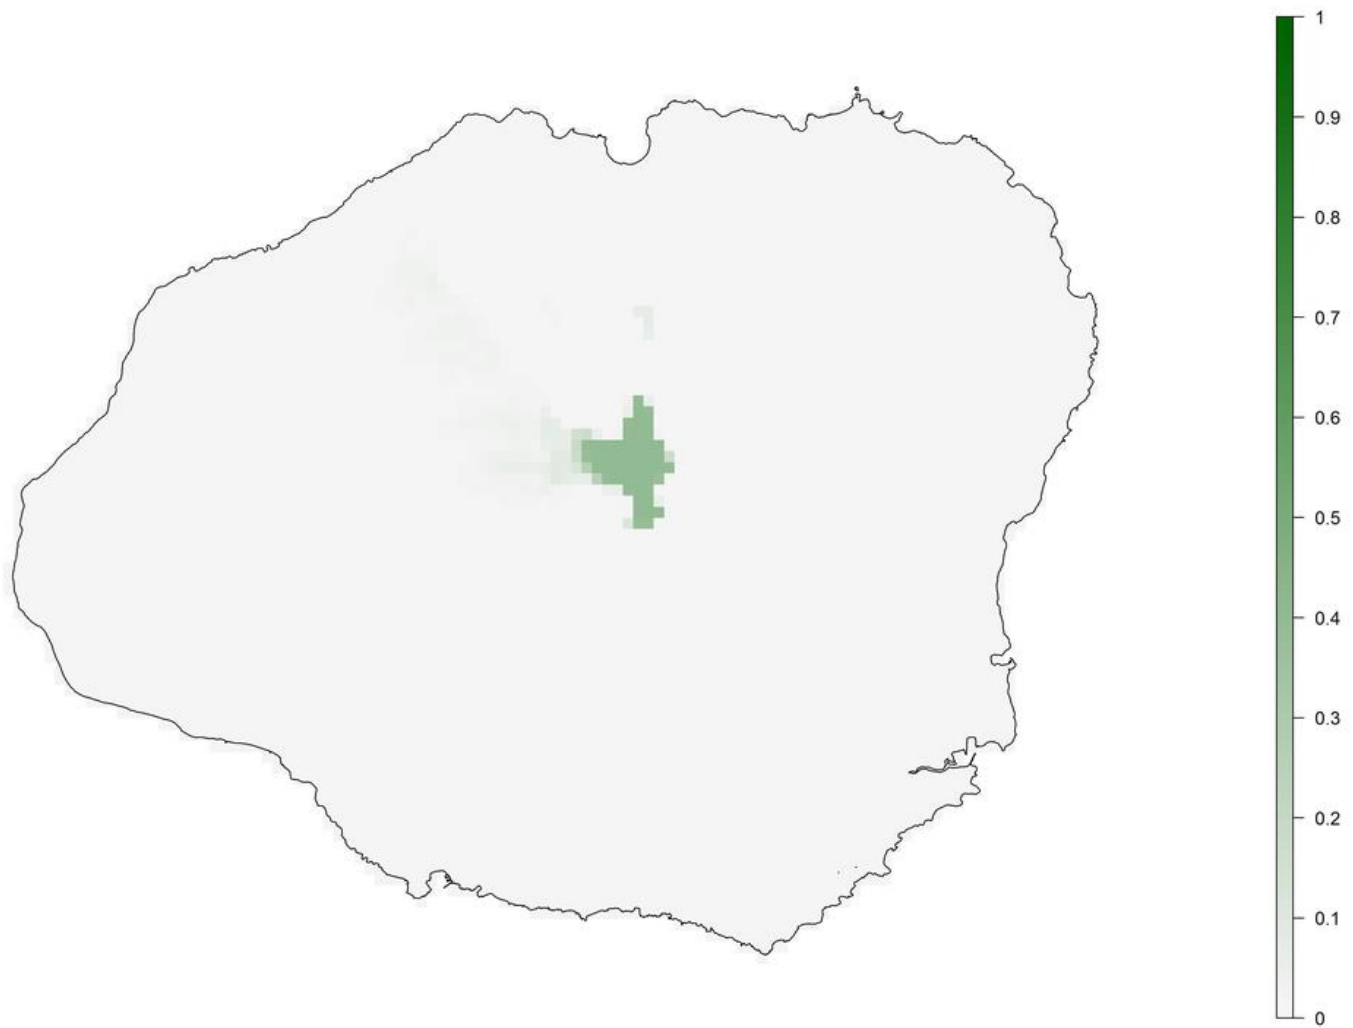

S1  
REDUCED MODEL RELIABILITY SPECIES

Anianiau baseline modeled suitability

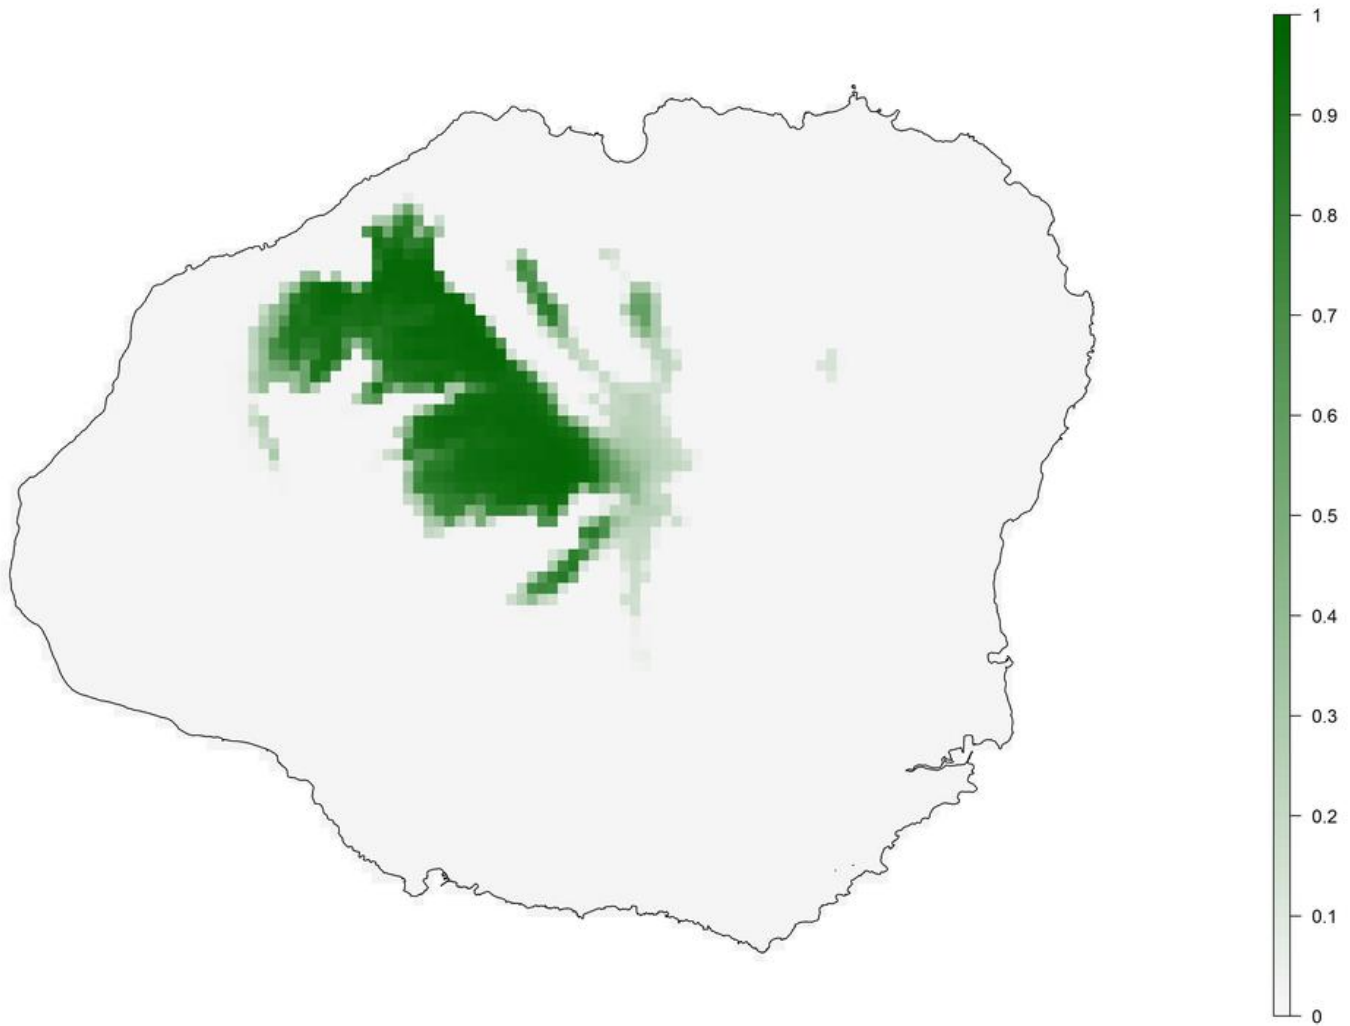

S1  
REDUCED MODEL RELIABILITY SPECIES

Anianiau future modeled suitability

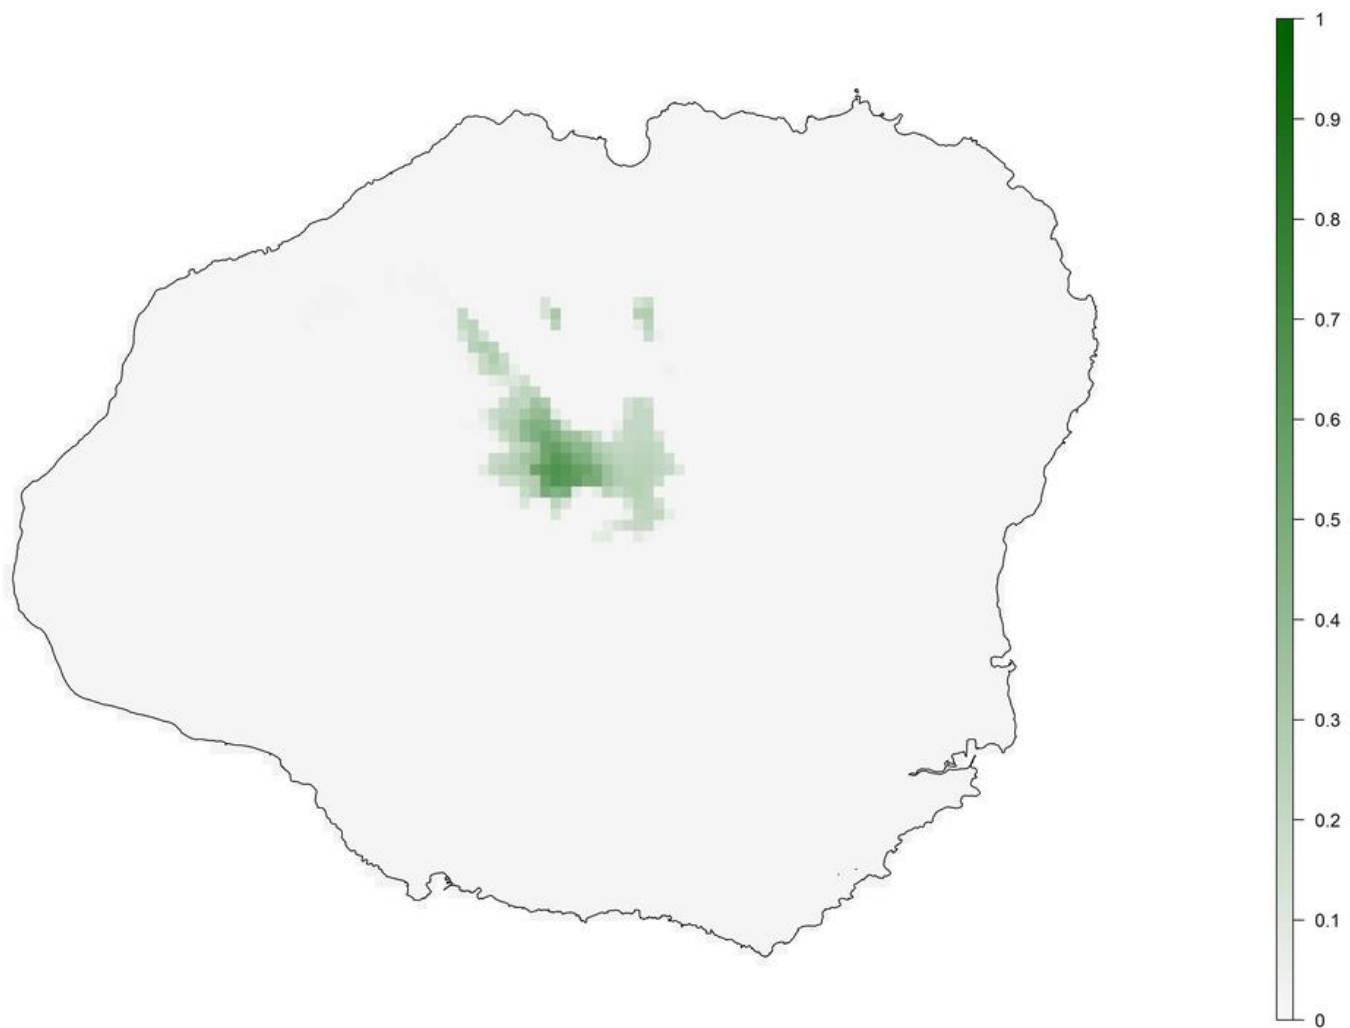

S1  
REDUCED MODEL RELIABILITY SPECIES

Apapane baseline modeled suitability

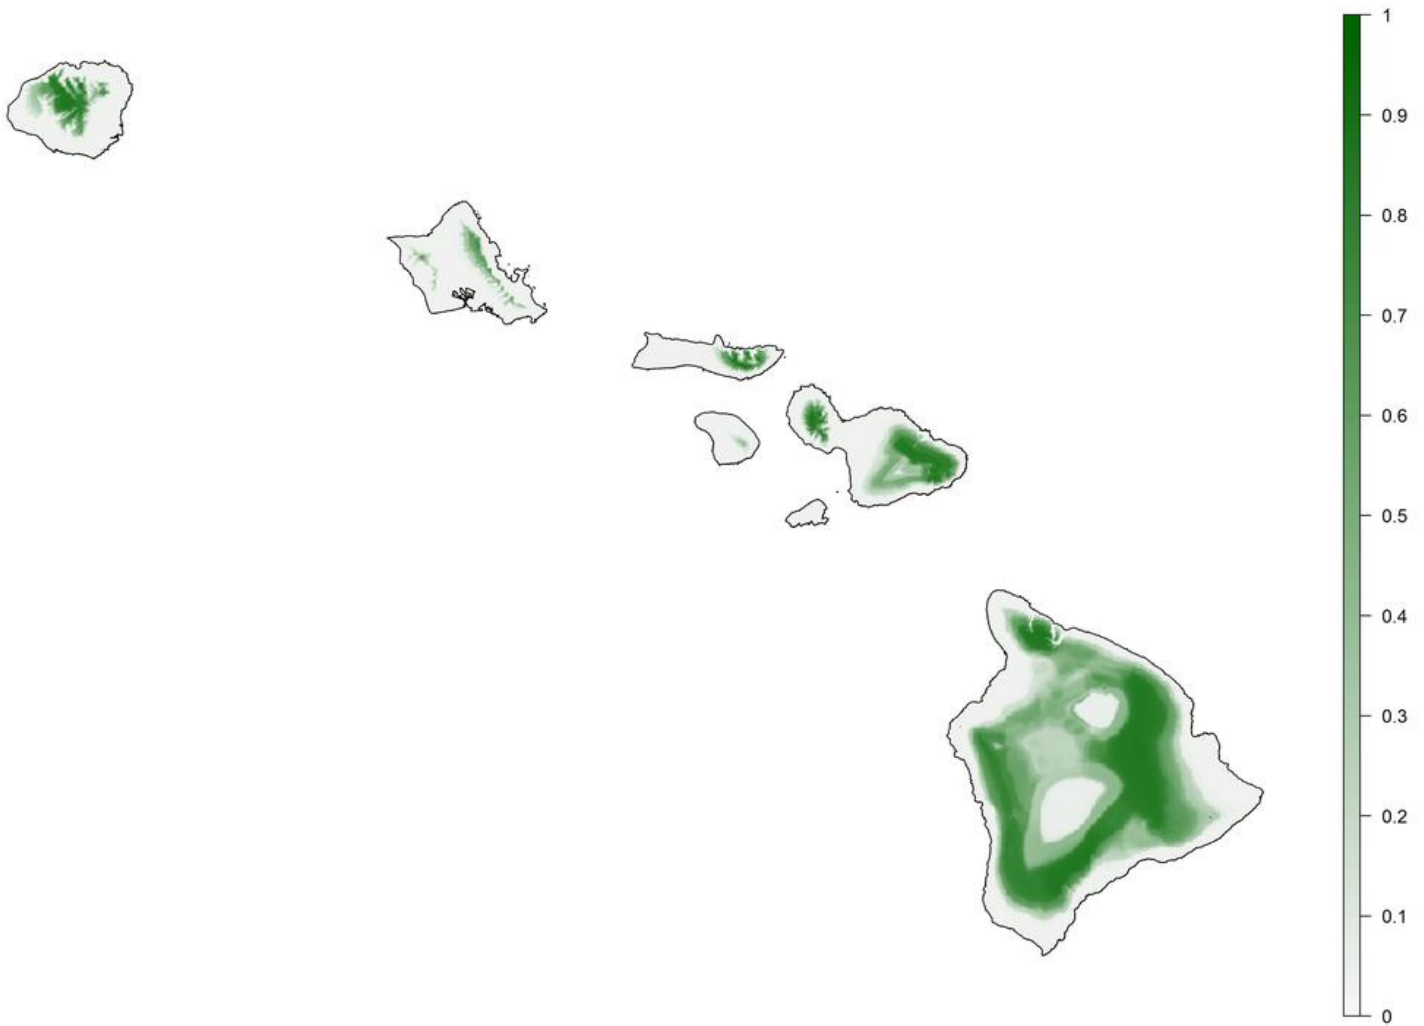



S1  
REDUCED MODEL RELIABILITY SPECIES

Apapane future modeled suitability

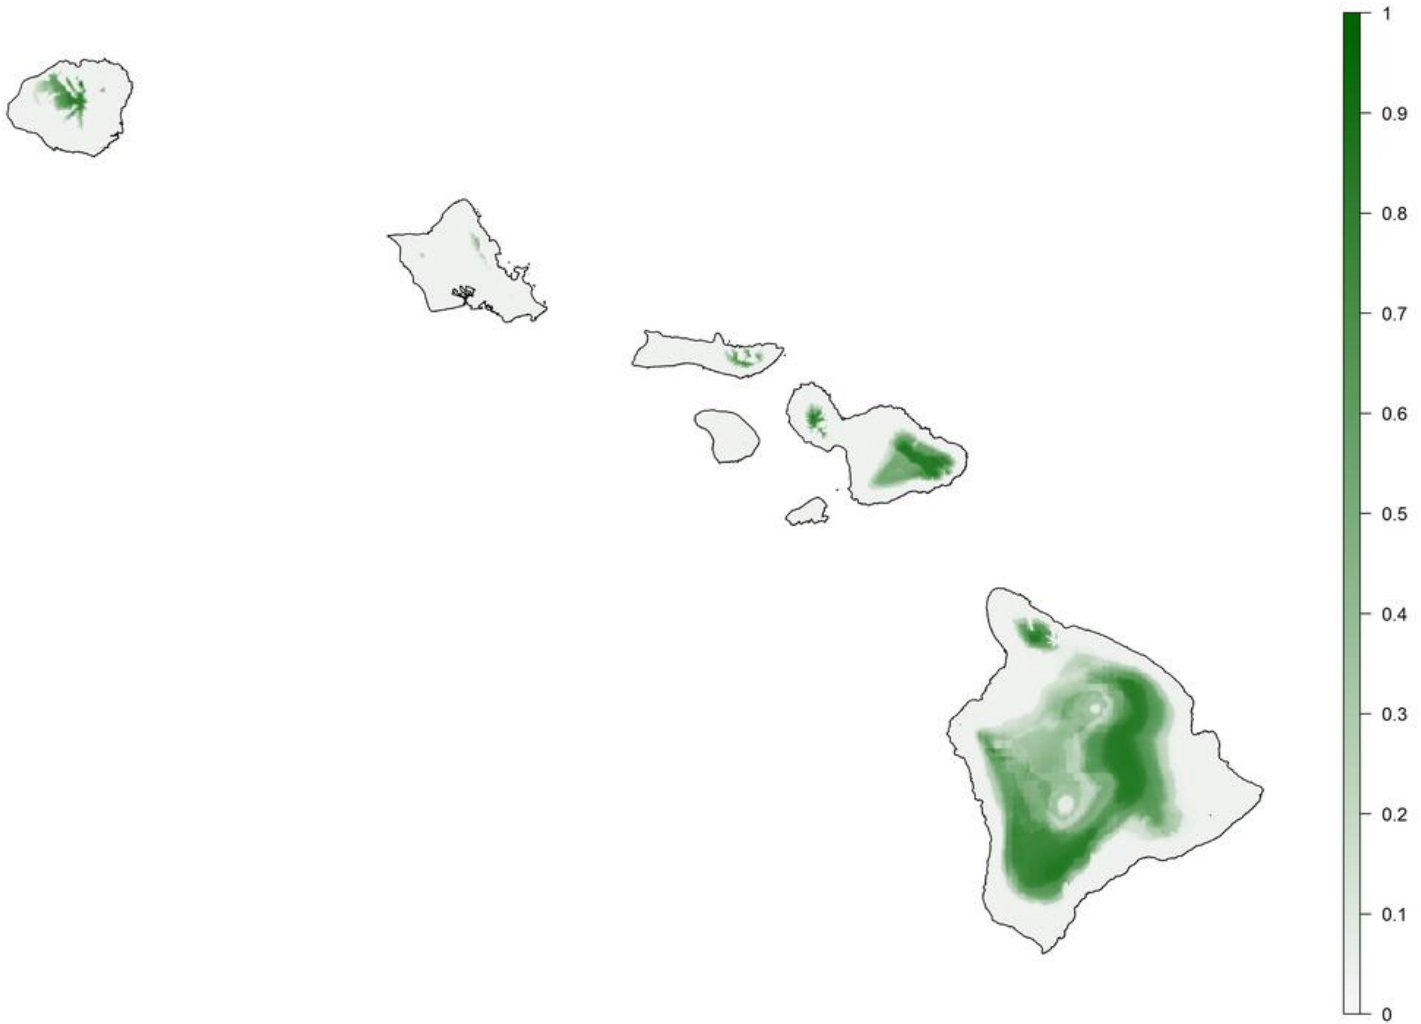

S1  
REDUCED MODEL RELIABILITY SPECIES  
Hawaii Amakihi baseline modeled suitability

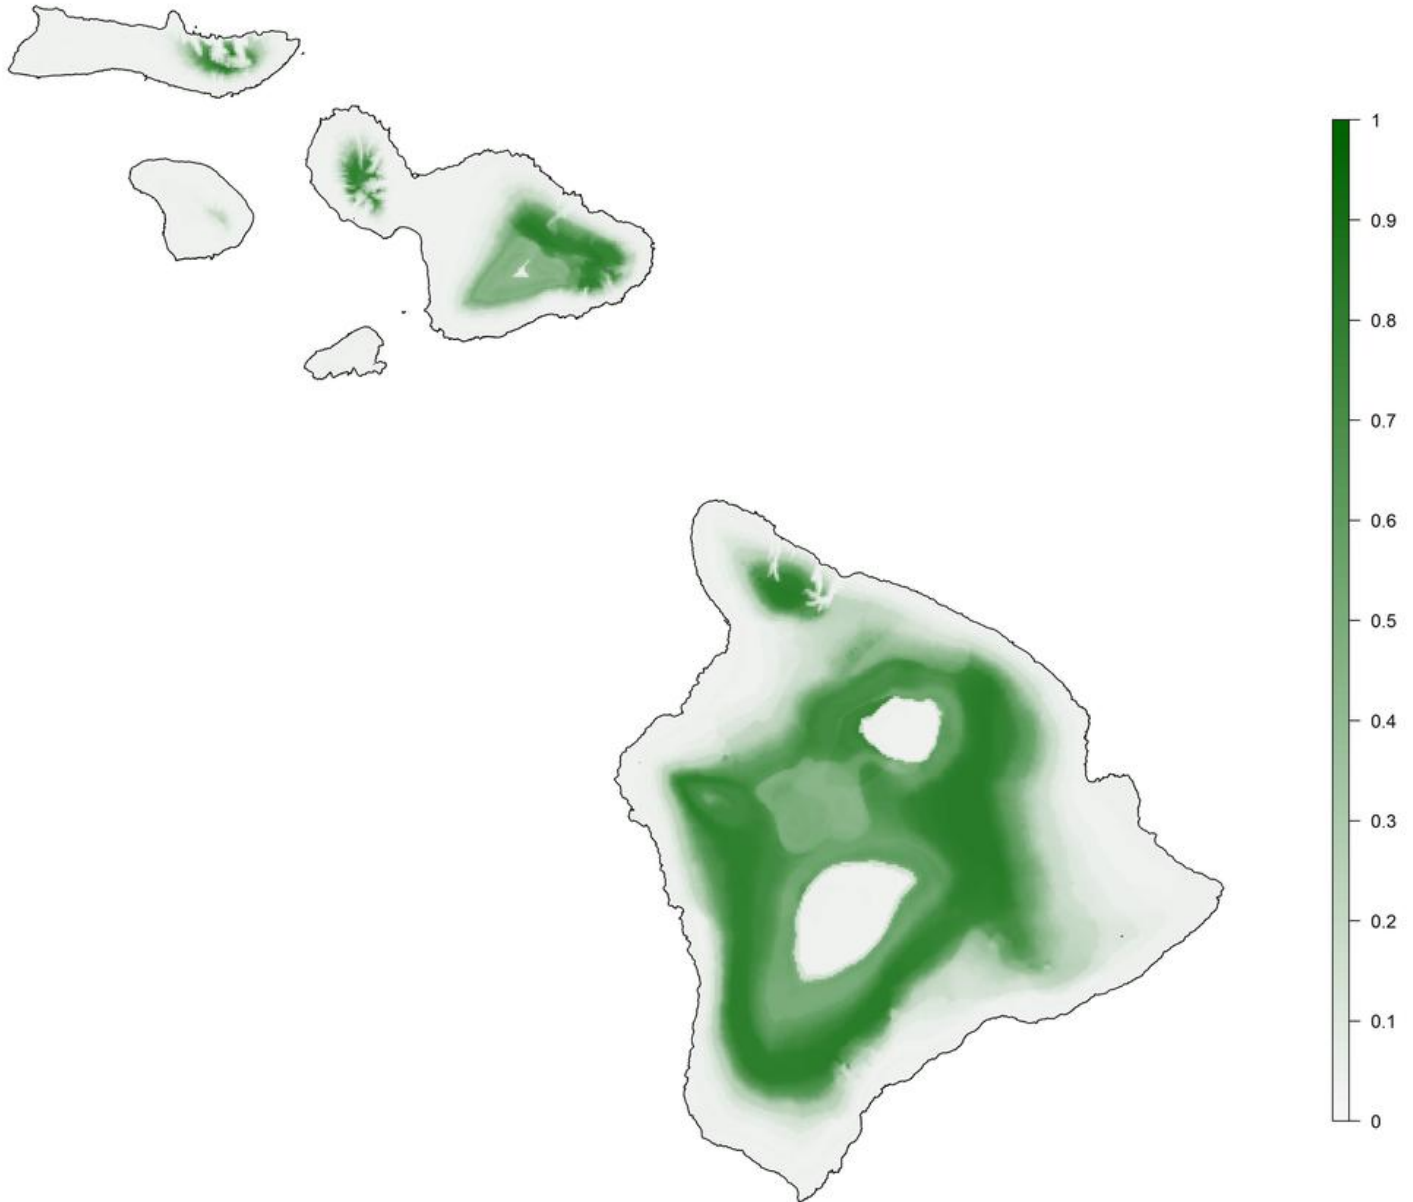

S1  
REDUCED MODEL RELIABILITY SPECIES  
Hawaii Amakihi future modeled suitability

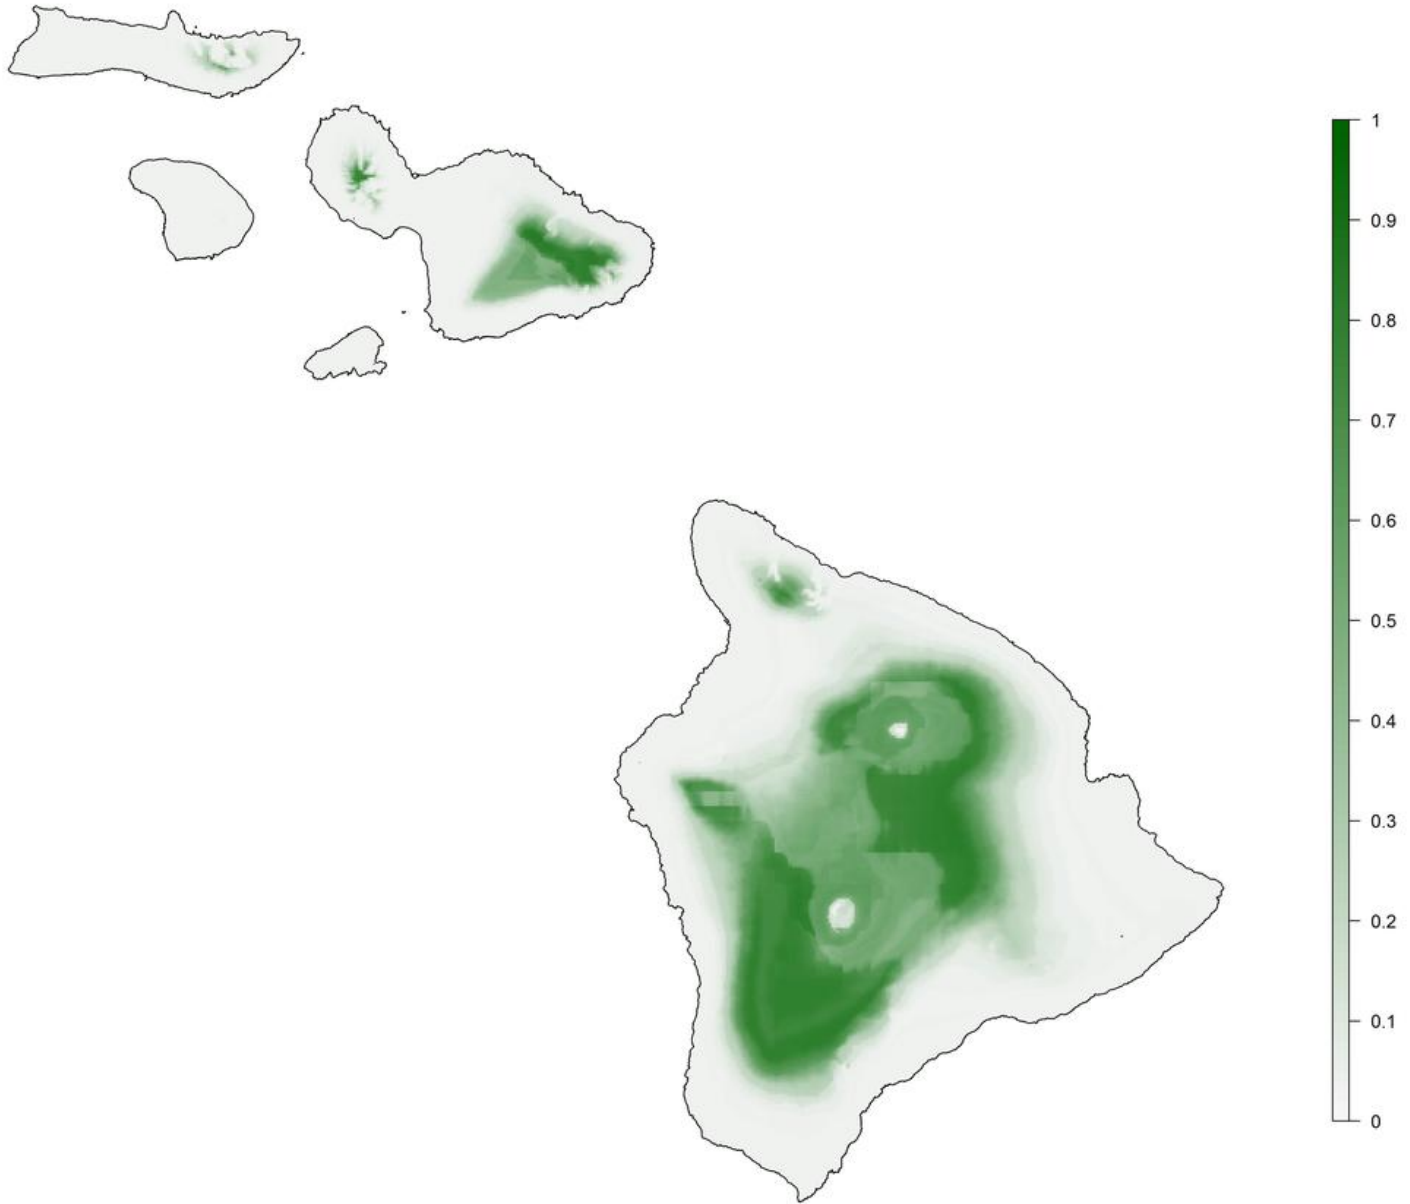

S1  
REDUCED MODEL RELIABILITY SPECIES  
Hawaii Elepaio baseline modeled suitability

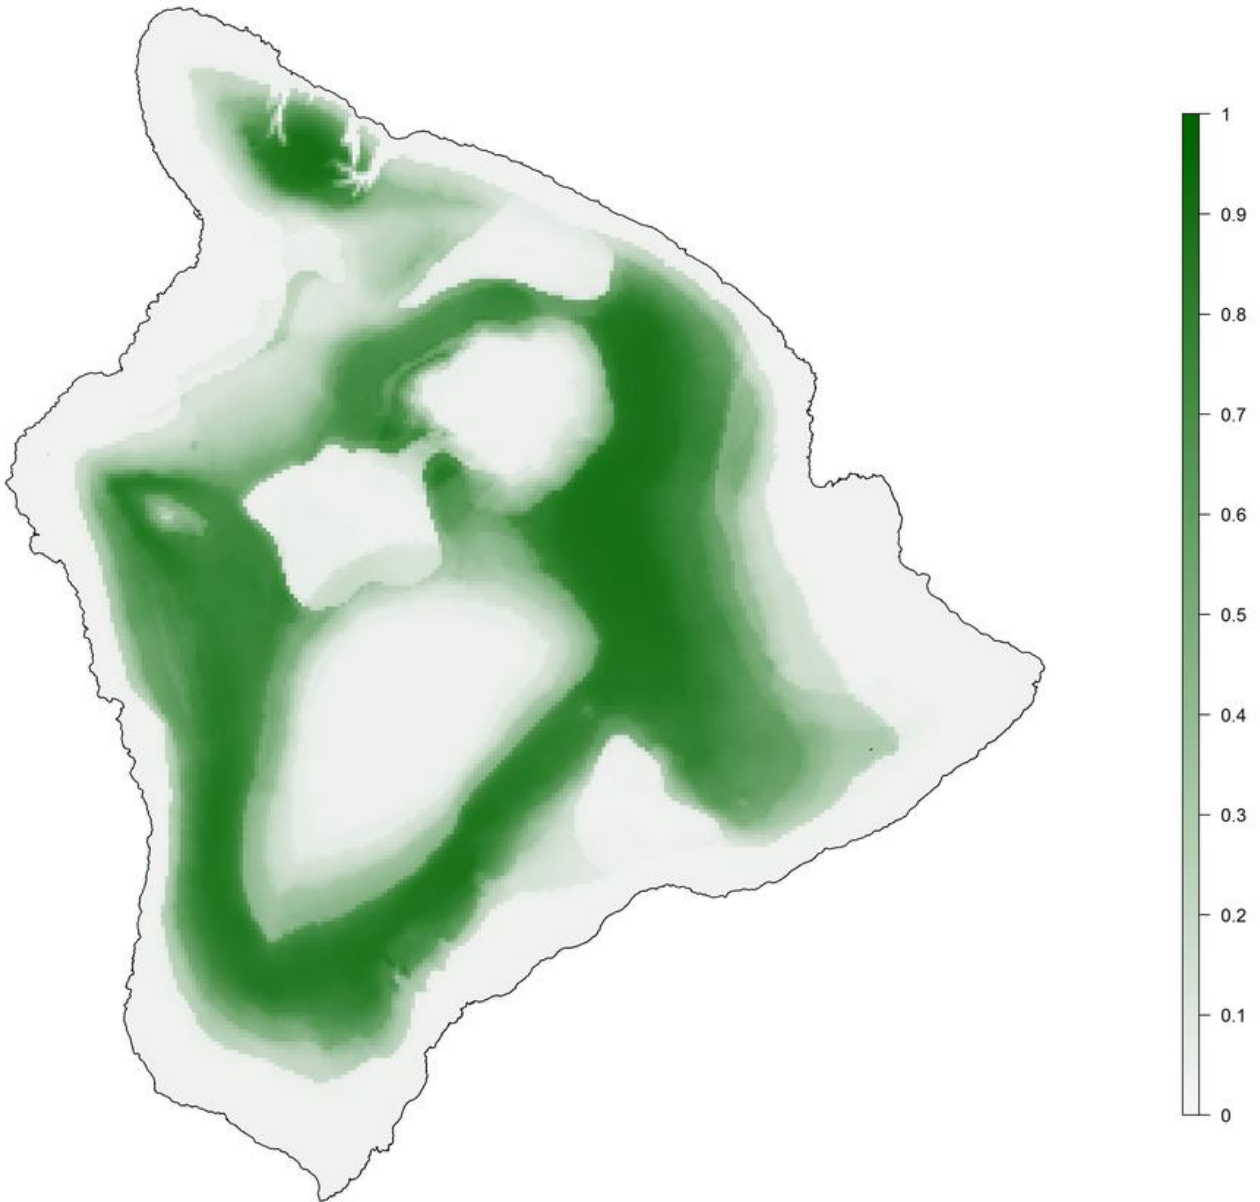

S1  
REDUCED MODEL RELIABILITY SPECIES

Hawaii Elepaio future modeled suitability

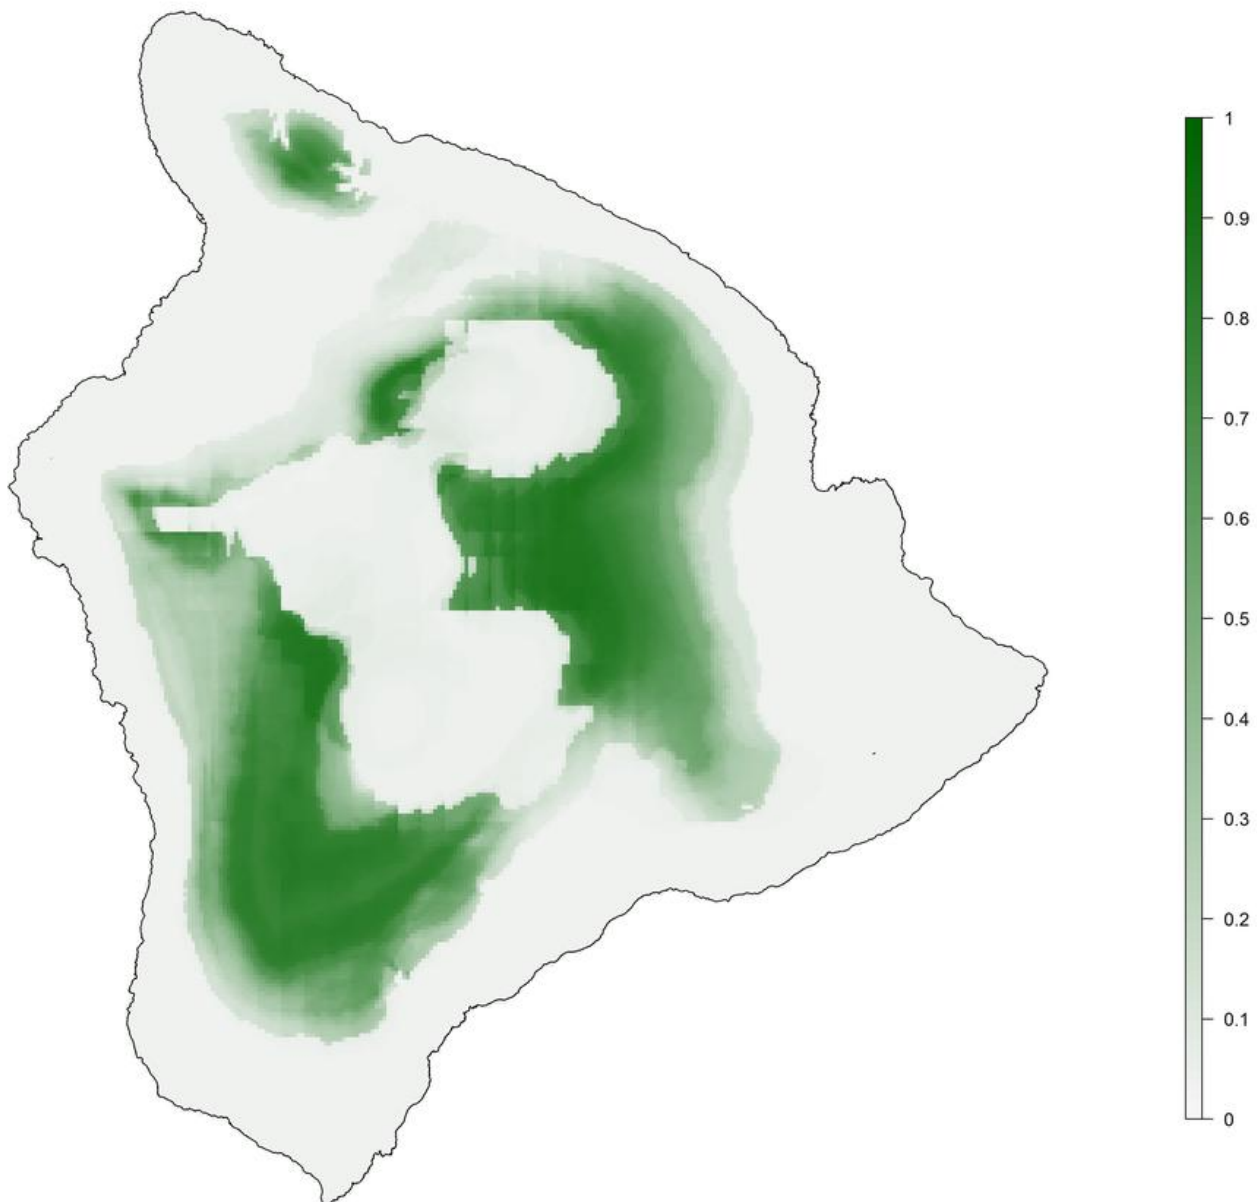

S1  
REDUCED MODEL RELIABILITY SPECIES  
Kauai Amakihi baseline modeled suitability

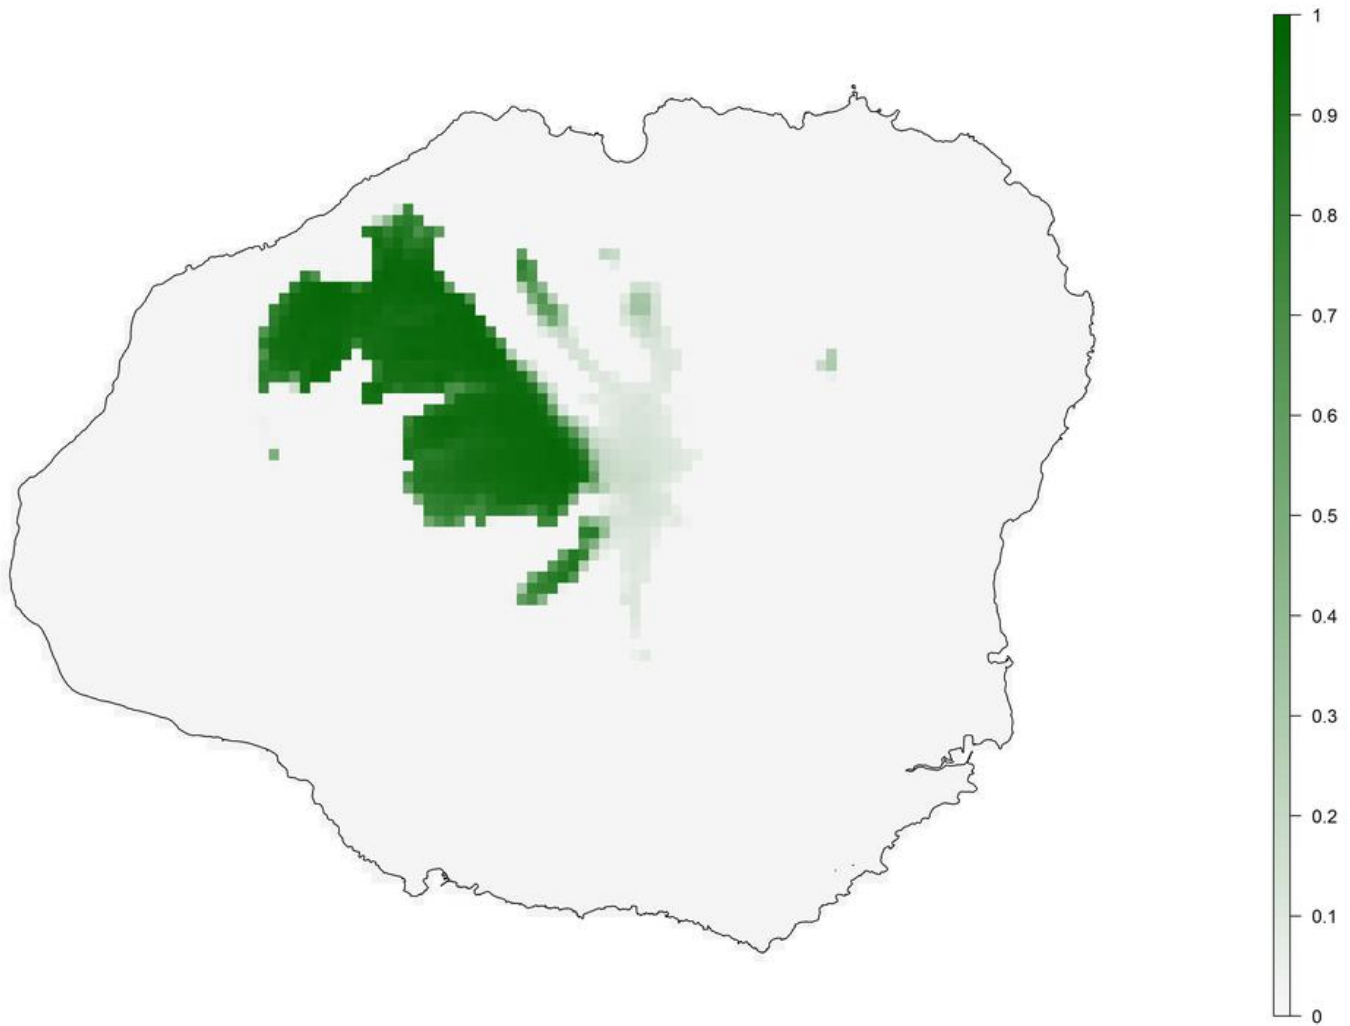

S1  
REDUCED MODEL RELIABILITY SPECIES

Kauai Amakihi future modeled suitability

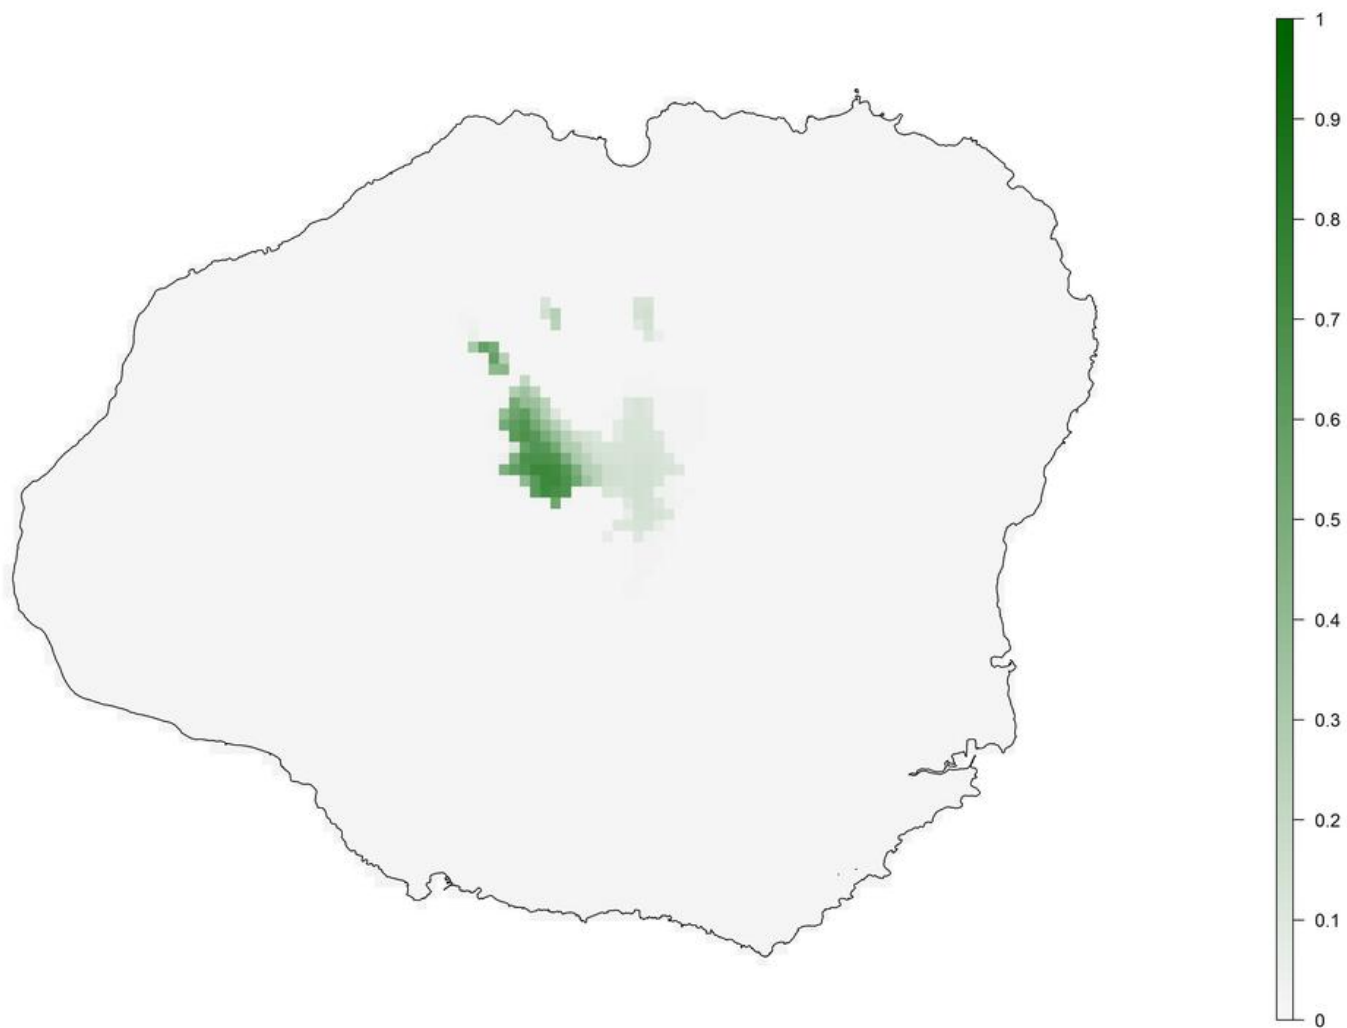

S1  
REDUCED MODEL RELIABILITY SPECIES  
Kauai Elepaio baseline modeled suitability

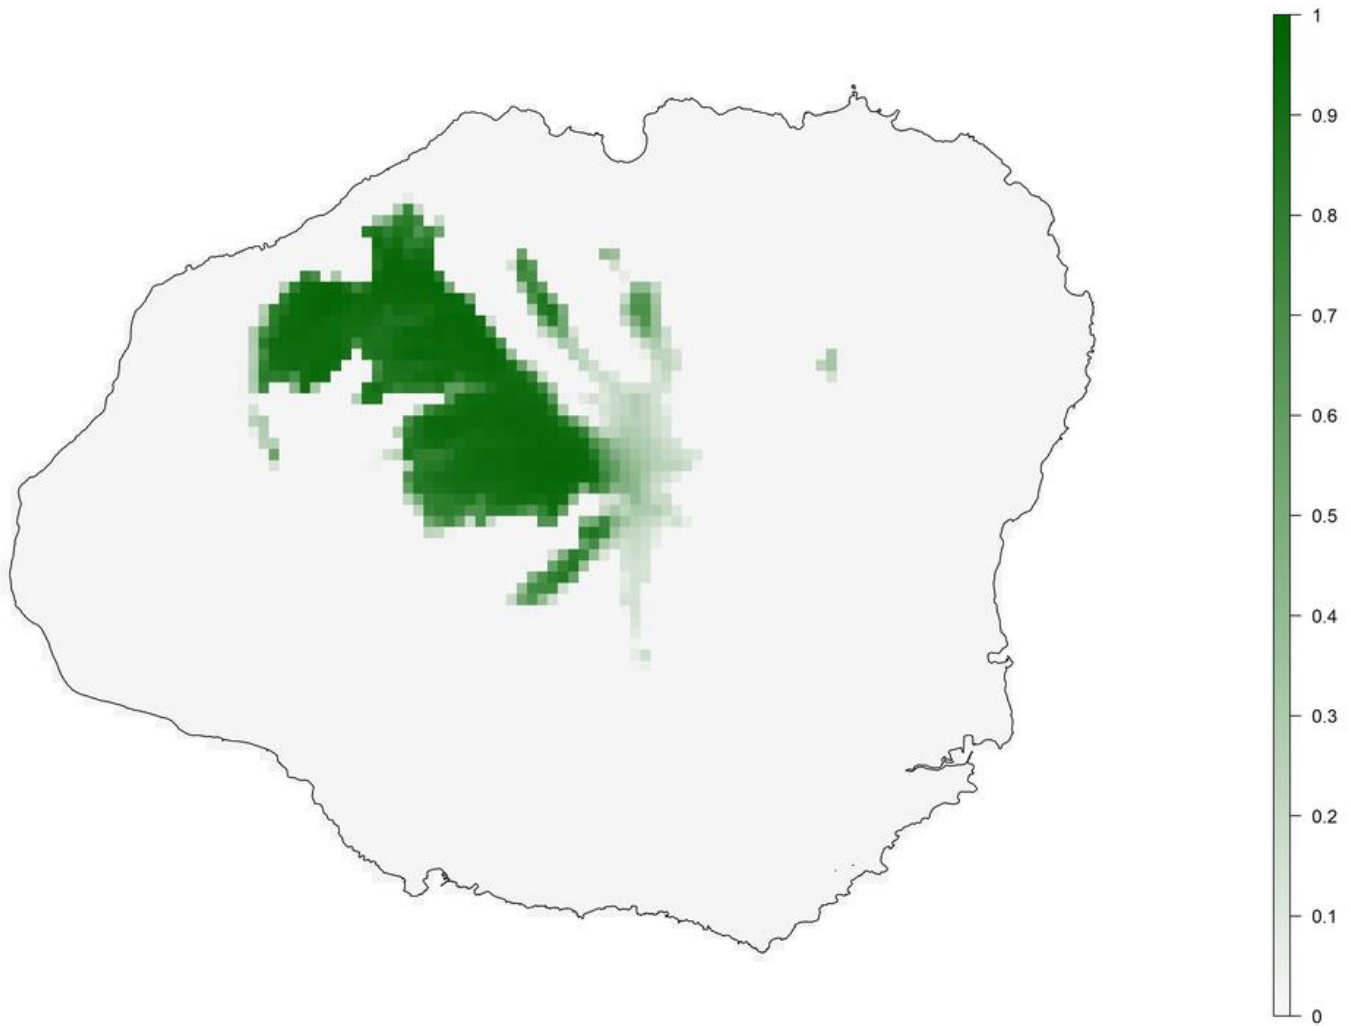



S1  
REDUCED MODEL RELIABILITY SPECIES

Kauai Elepaio future modeled suitability

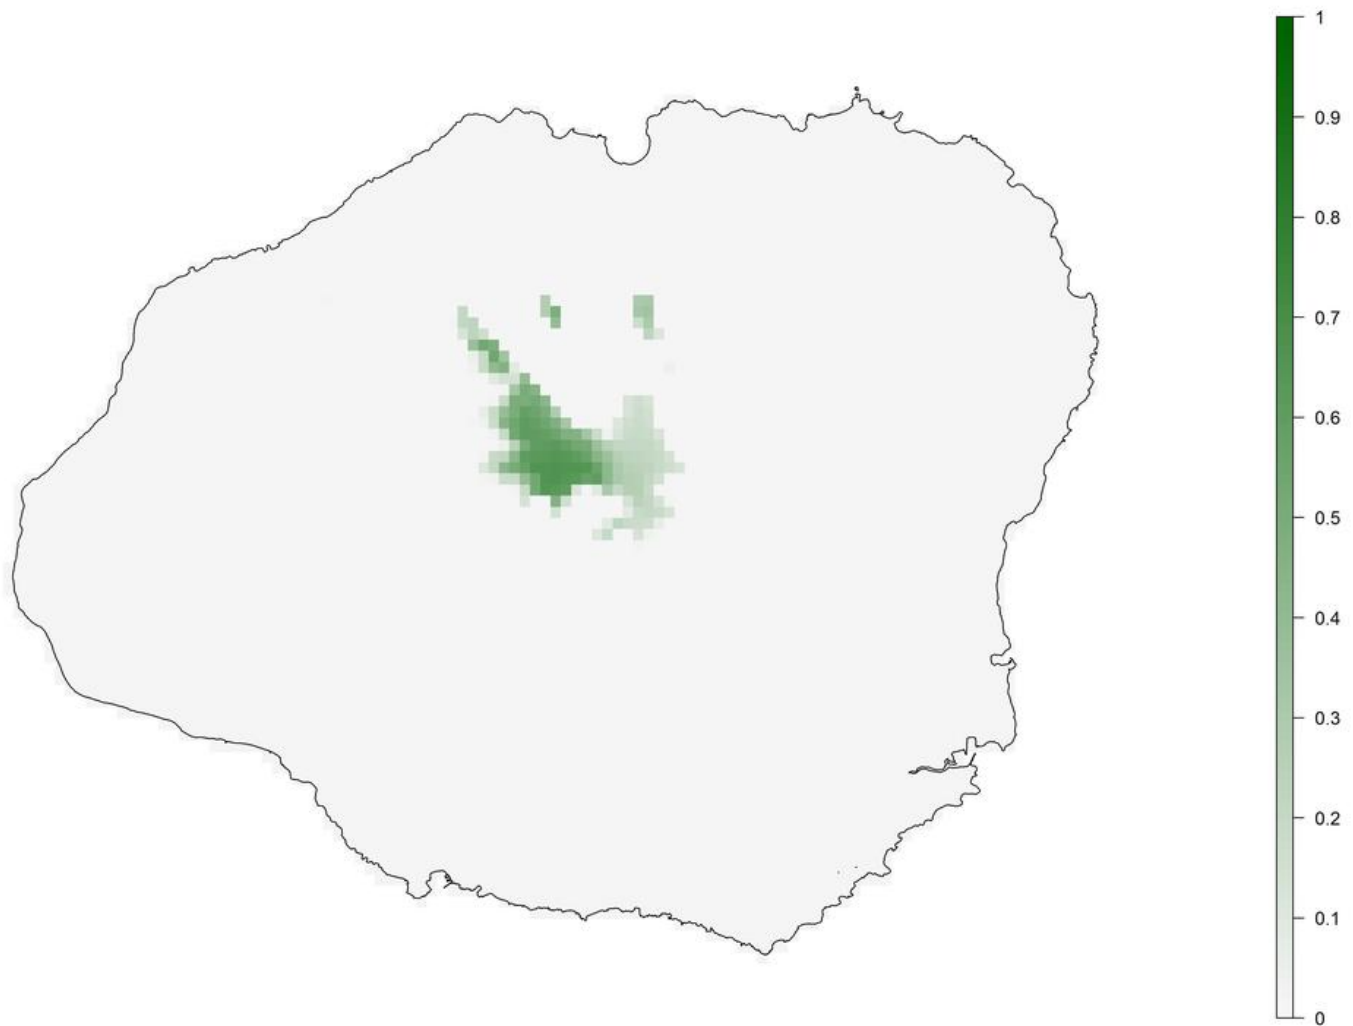

S1  
REDUCED MODEL RELIABILITY SPECIES  
Oahu Amakihi baseline modeled suitability

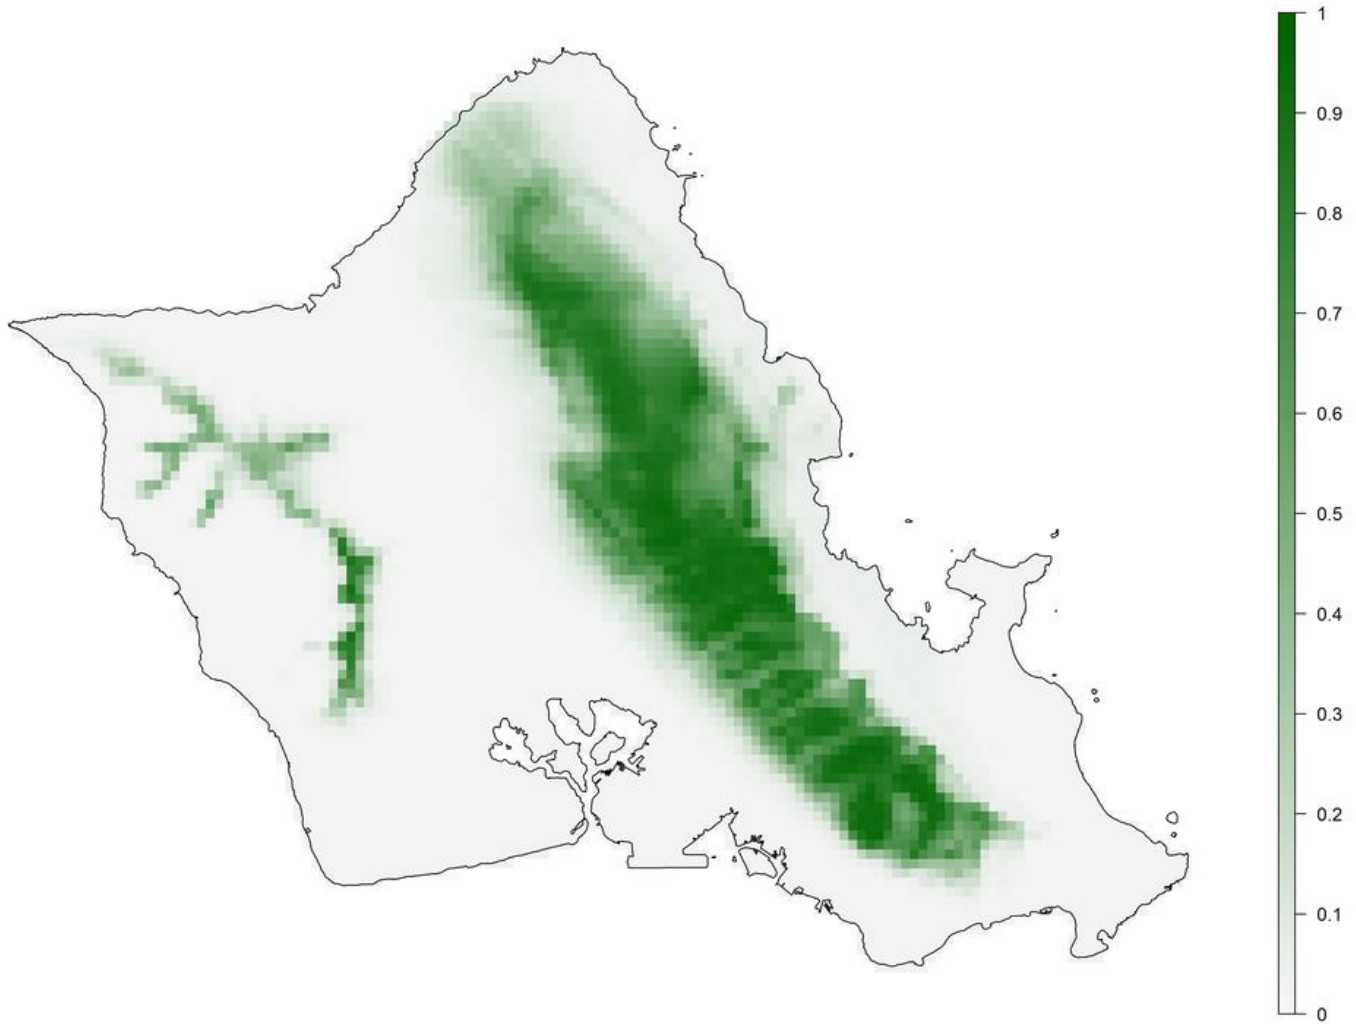

S1  
REDUCED MODEL RELIABILITY SPECIES

Oahu Amakihi future modeled suitability

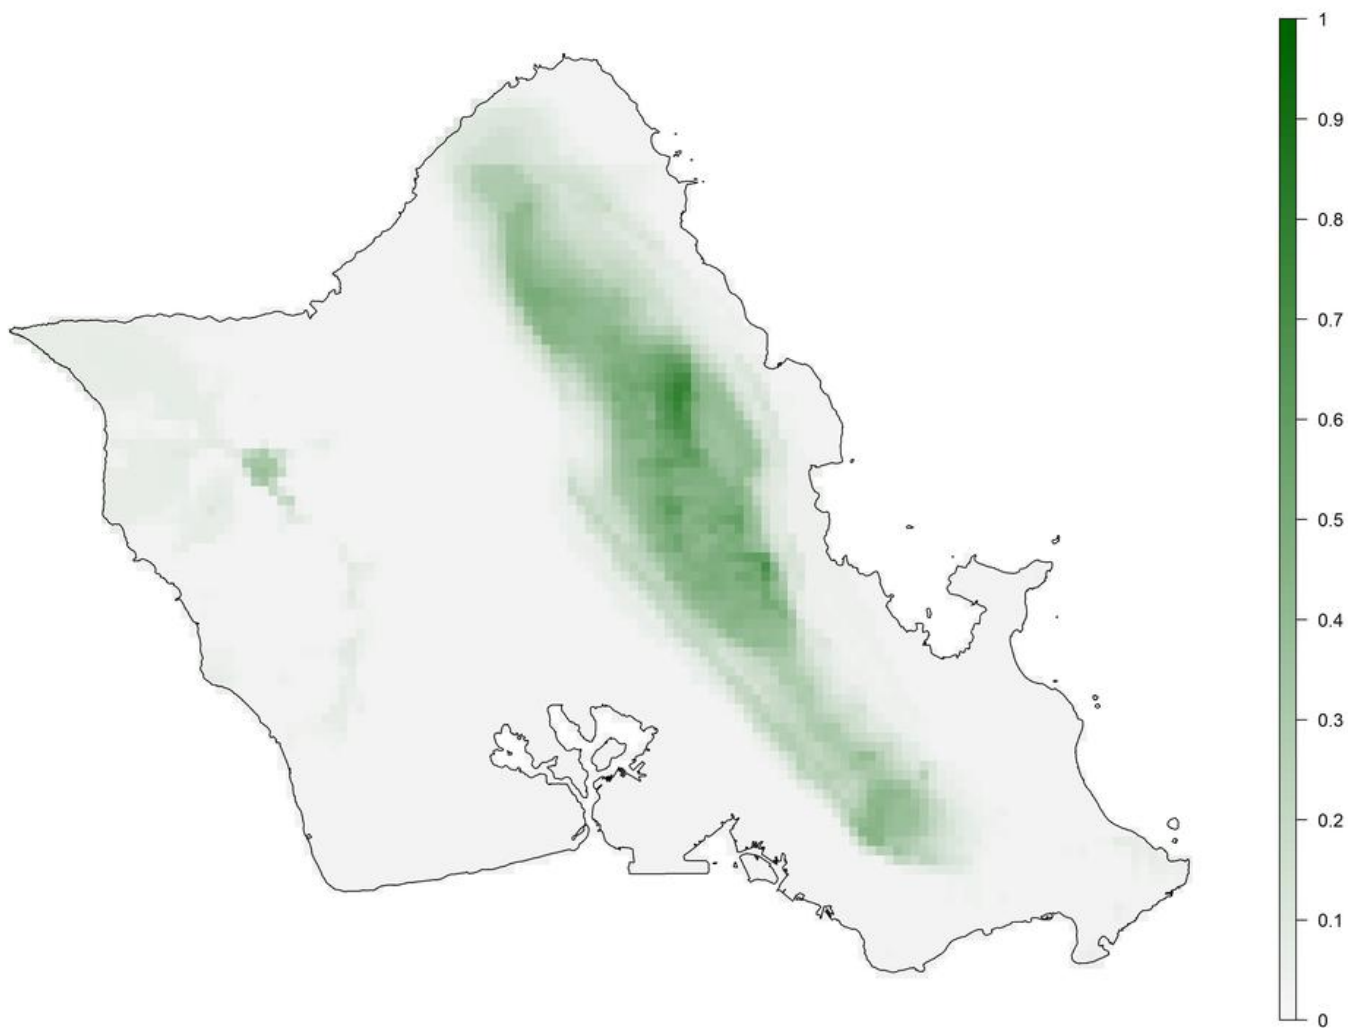

S1  
REDUCED MODEL RELIABILITY SPECIES

Oahu Elepaio baseline modeled suitability

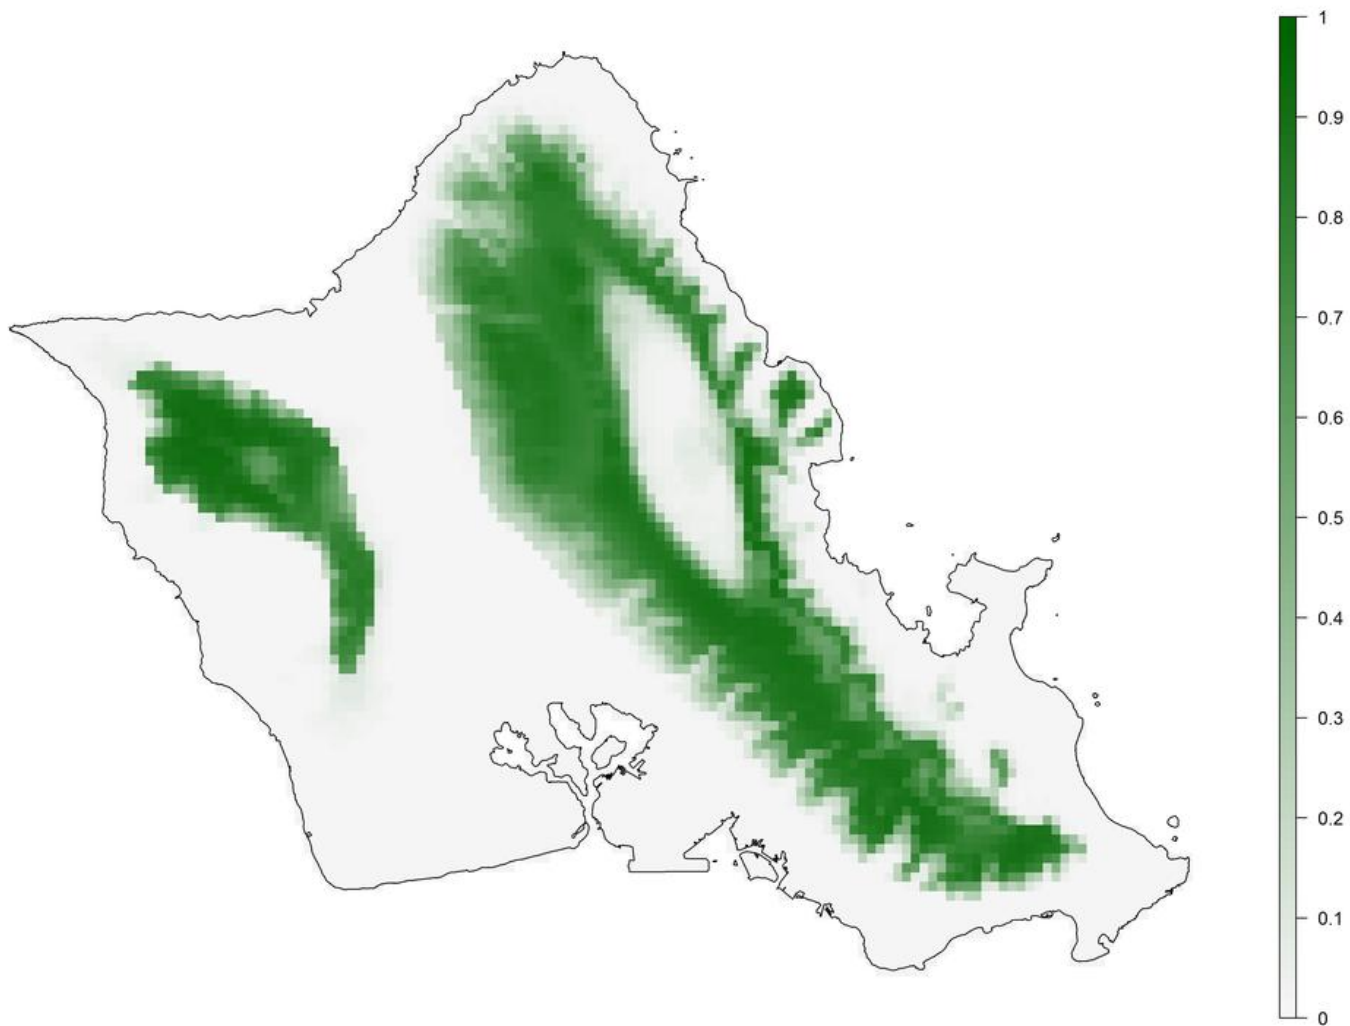

S1  
REDUCED MODEL RELIABILITY SPECIES

Oahu Elepaio future modeled suitability

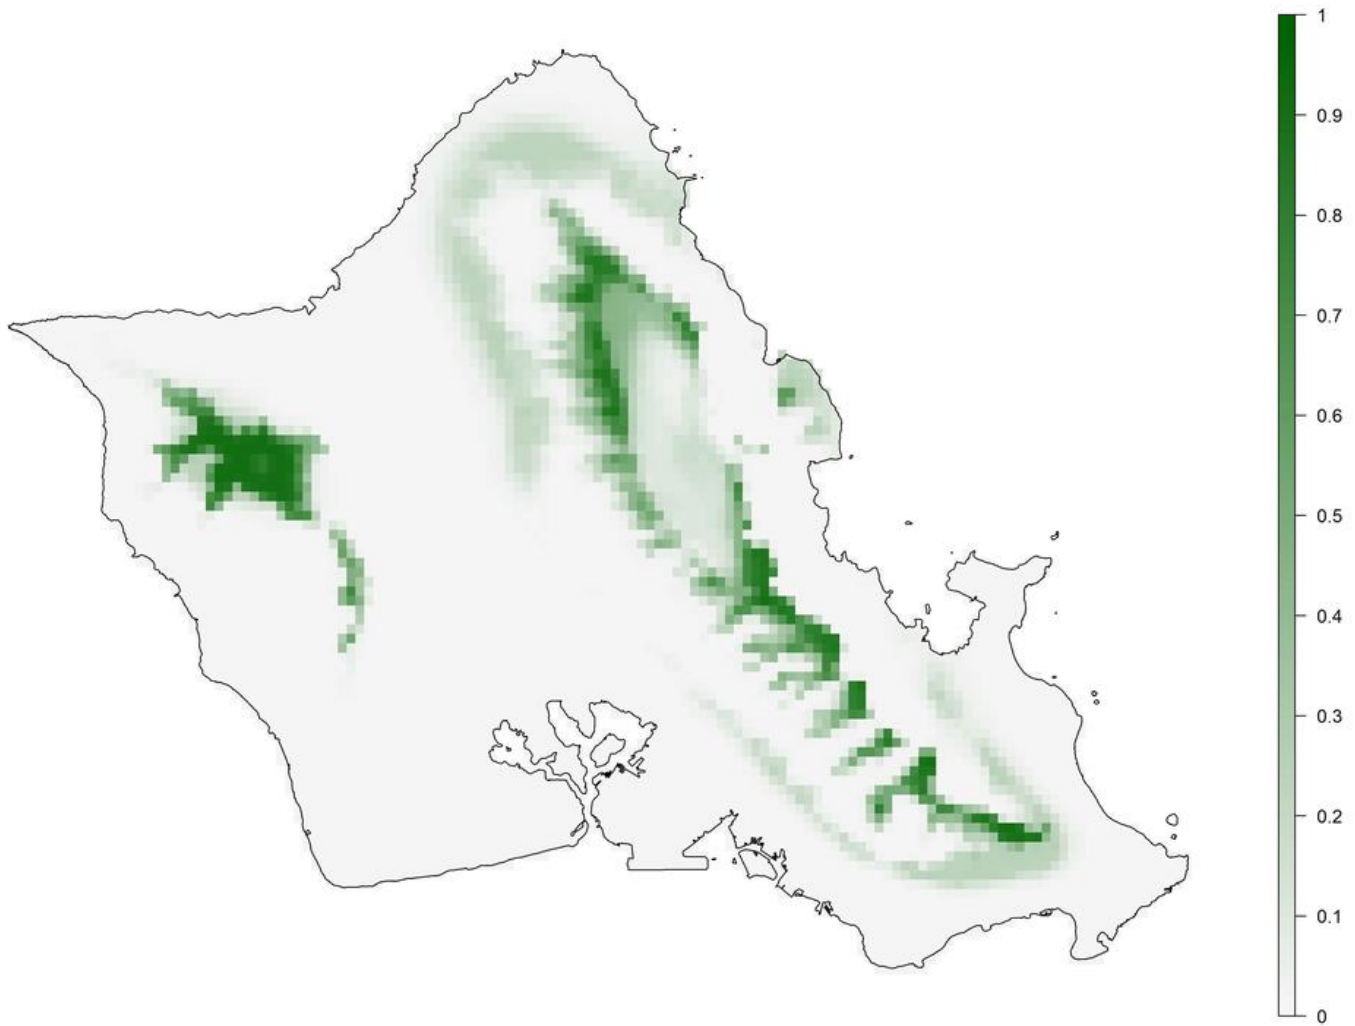

S1  
REDUCED MODEL RELIABILITY SPECIES

Omao baseline modeled suitability

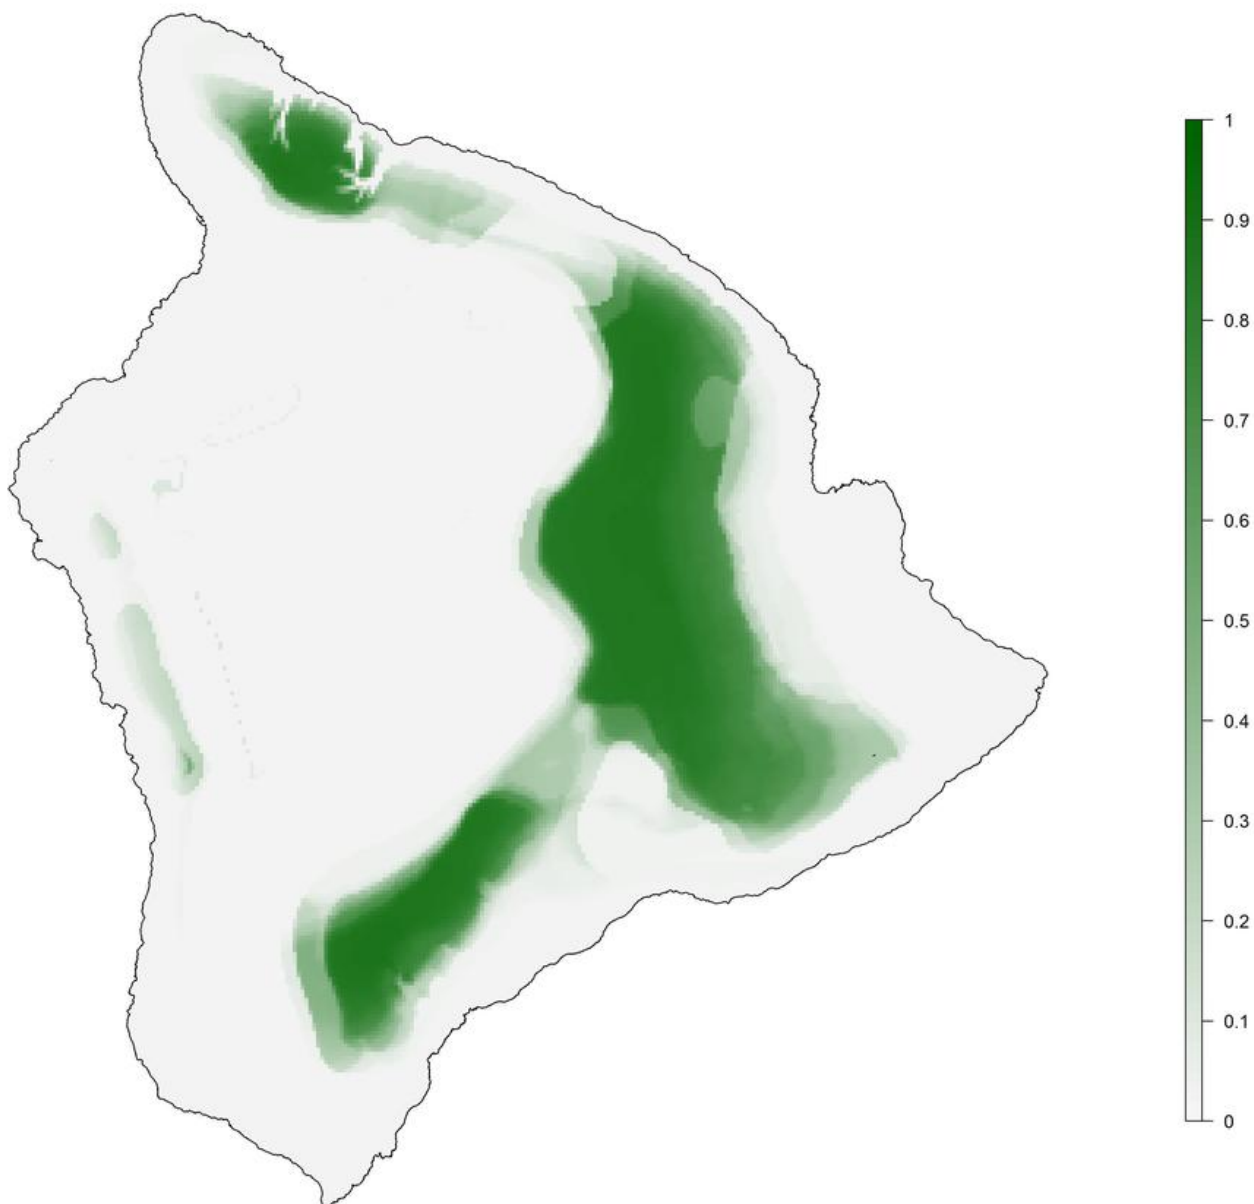

S1  
REDUCED MODEL RELIABILITY SPECIES

Omao future modeled suitability

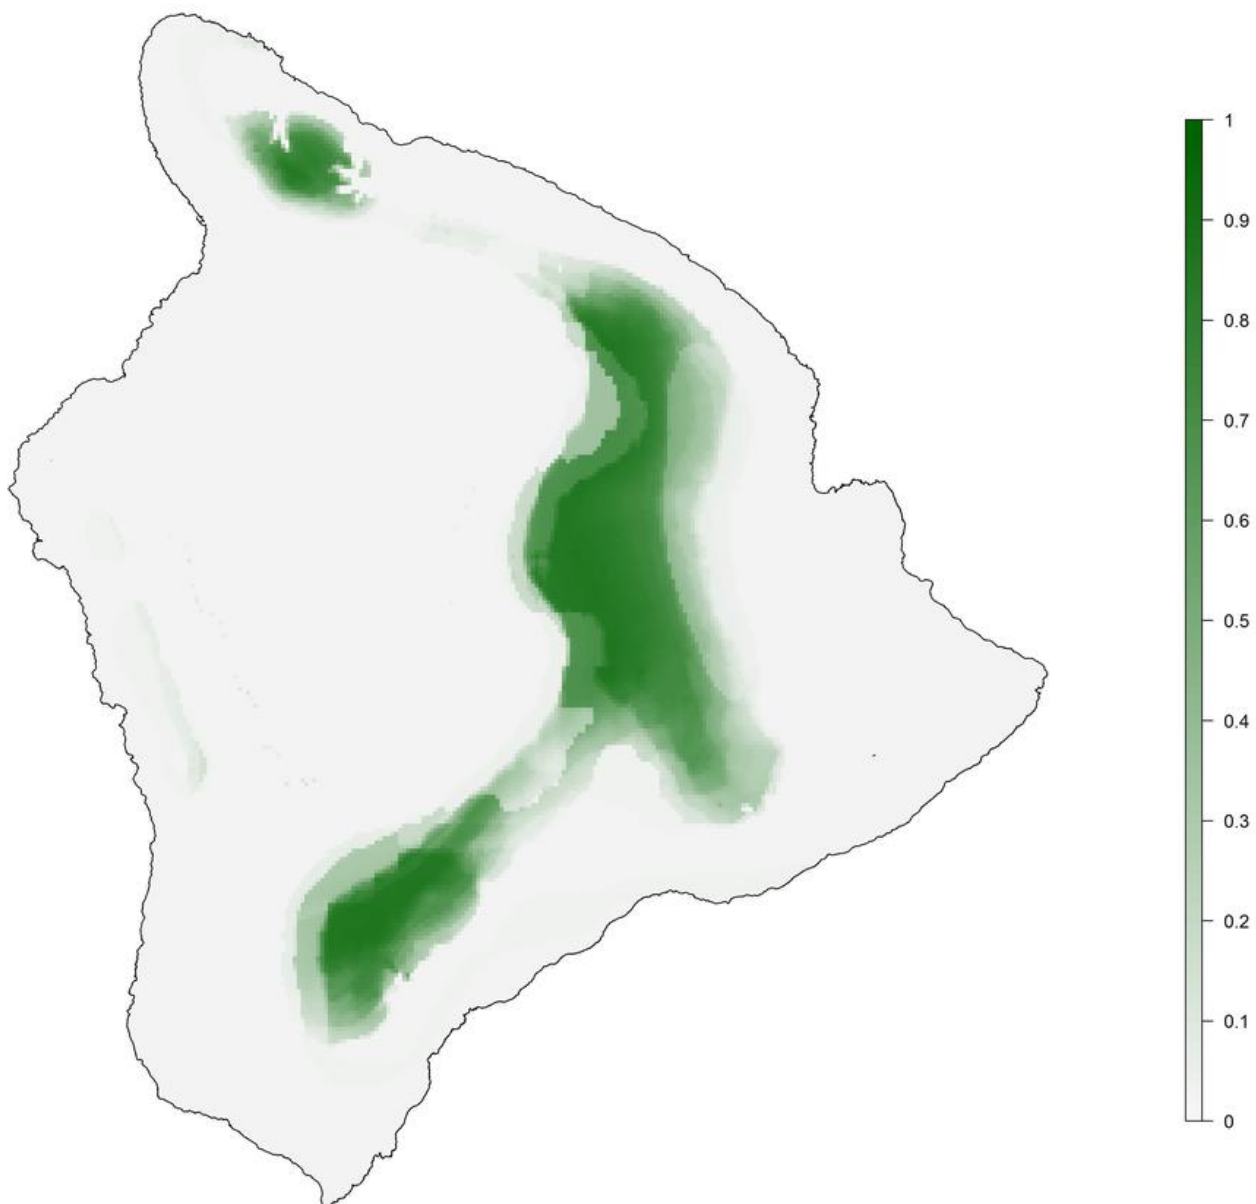

S1  
REDUCED MODEL RELIABILITY SPECIES

Palila baseline modeled suitability

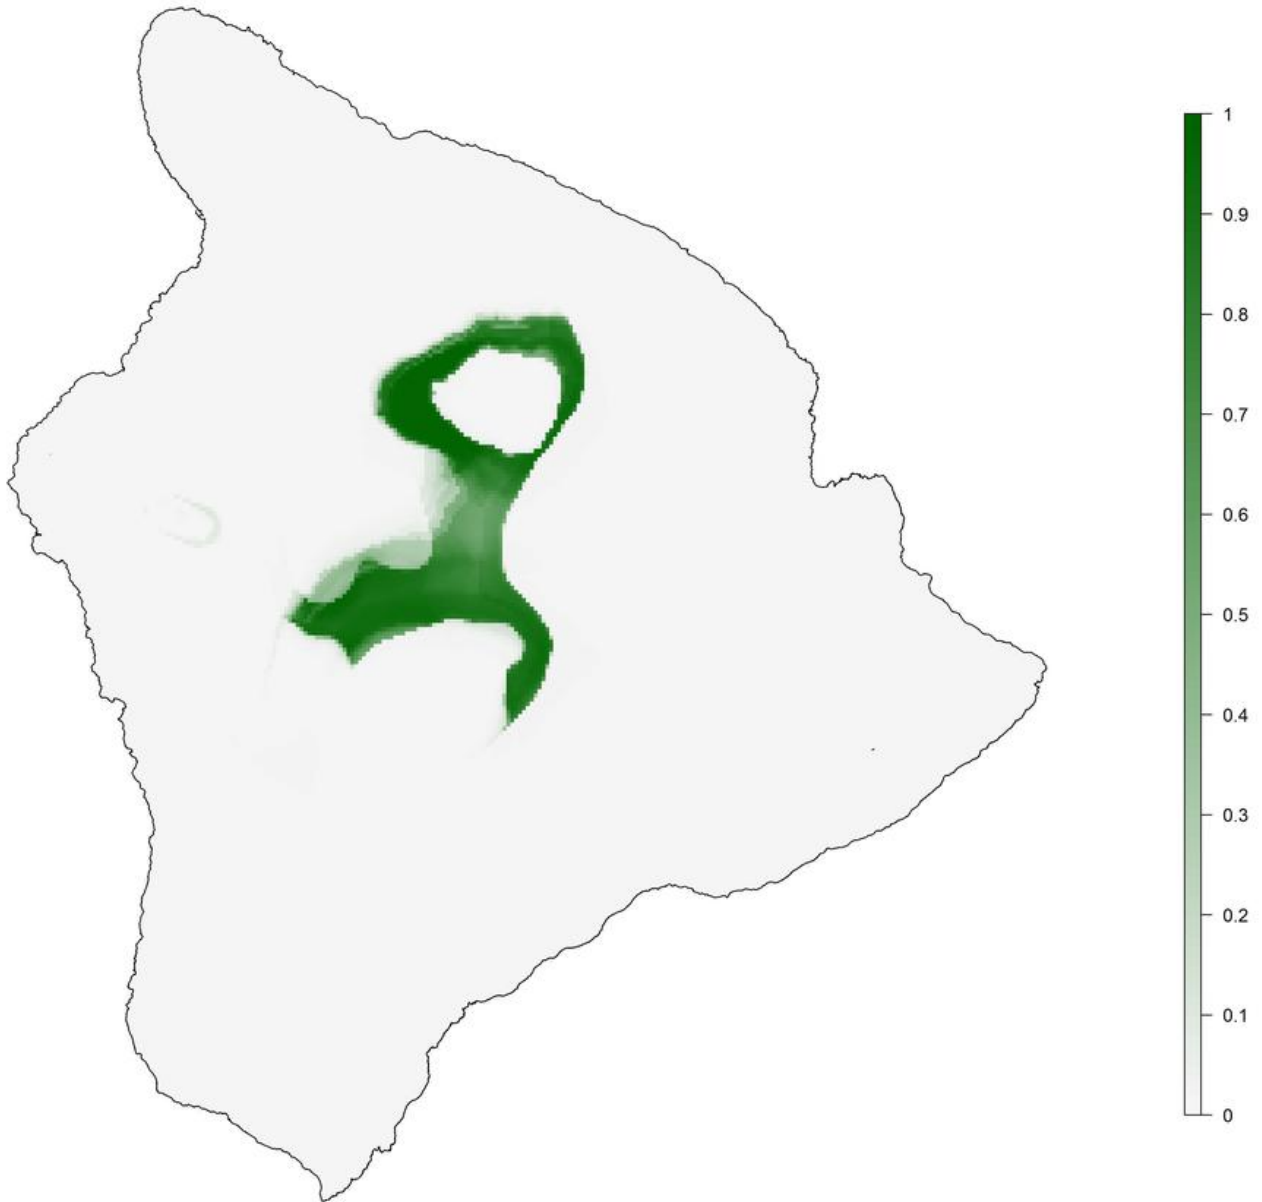



S1  
REDUCED MODEL RELIABILITY SPECIES

Palila future modeled suitability

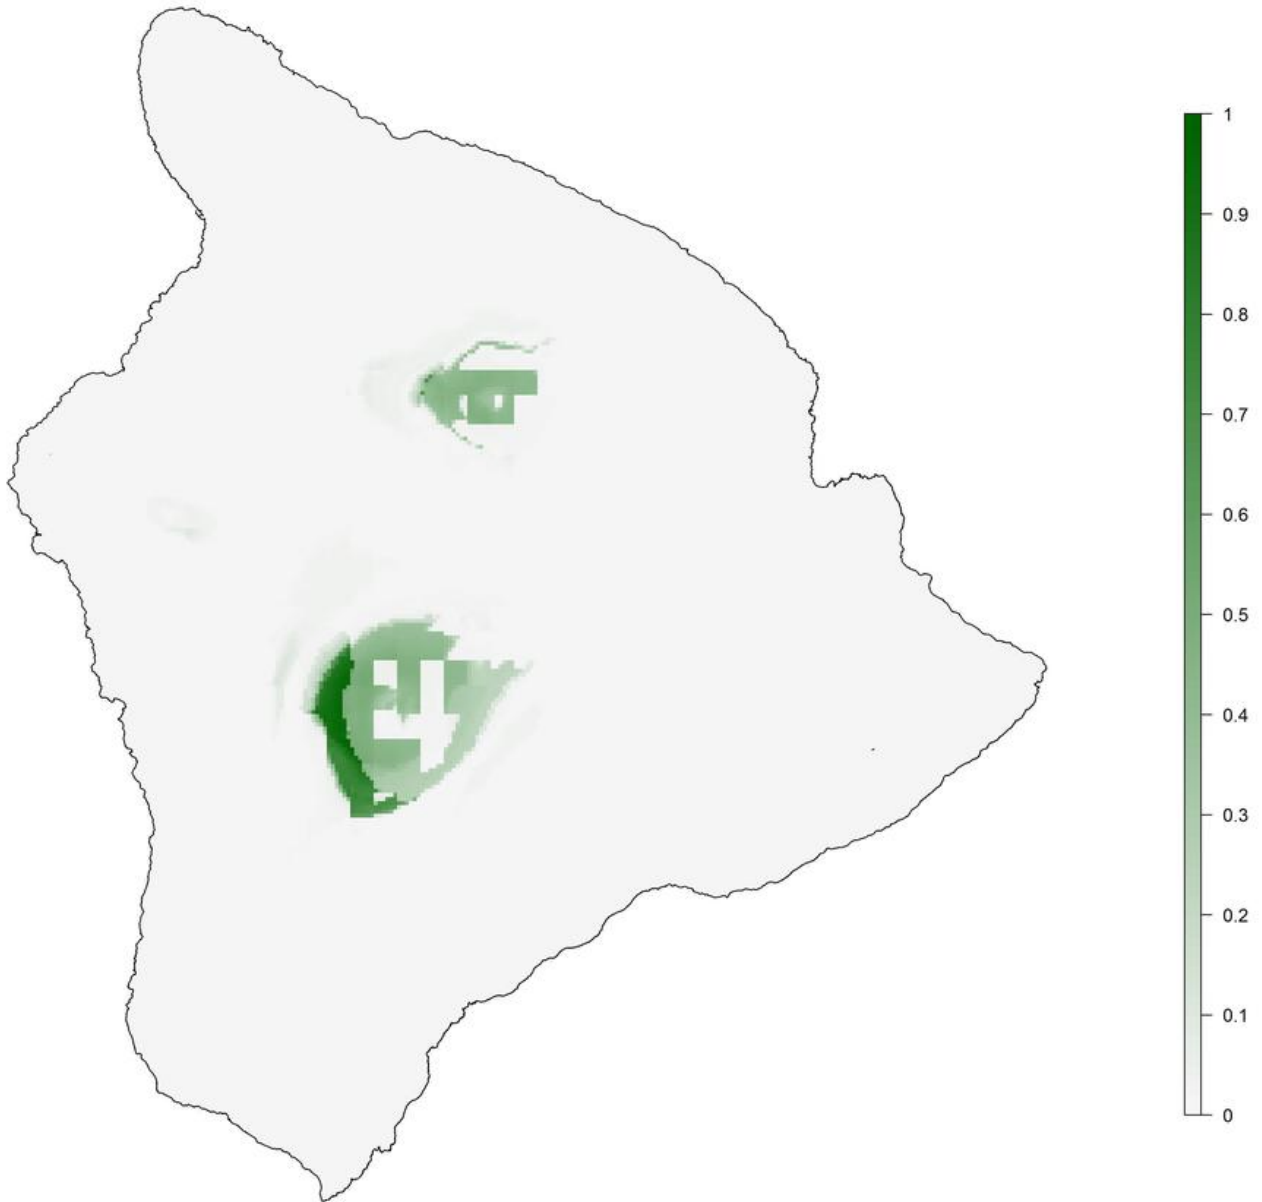

Supplement: pone.0140389.s001.pdf [file pone.0140389.s001.pdf]
