# Supplementary material for: Large-Scale Range Collapse of Hawaiian Forest Birds under Climate Change and the Need 21st Century Conservation Options
Source: PubMed Central journal article supplement (PMC4625087; doi:10.1371/journal.pone.0140389), 2015-10-28

**Appendix S2.** ROC and TSS evaluation scores for MaxEnt and GBM individual species models

ROC and TSS model evaluation scores for all species and modeling approaches.

Generated using the `1opt_model_eval_graph.R` script in repository.

ROC GBM variable importance box plot

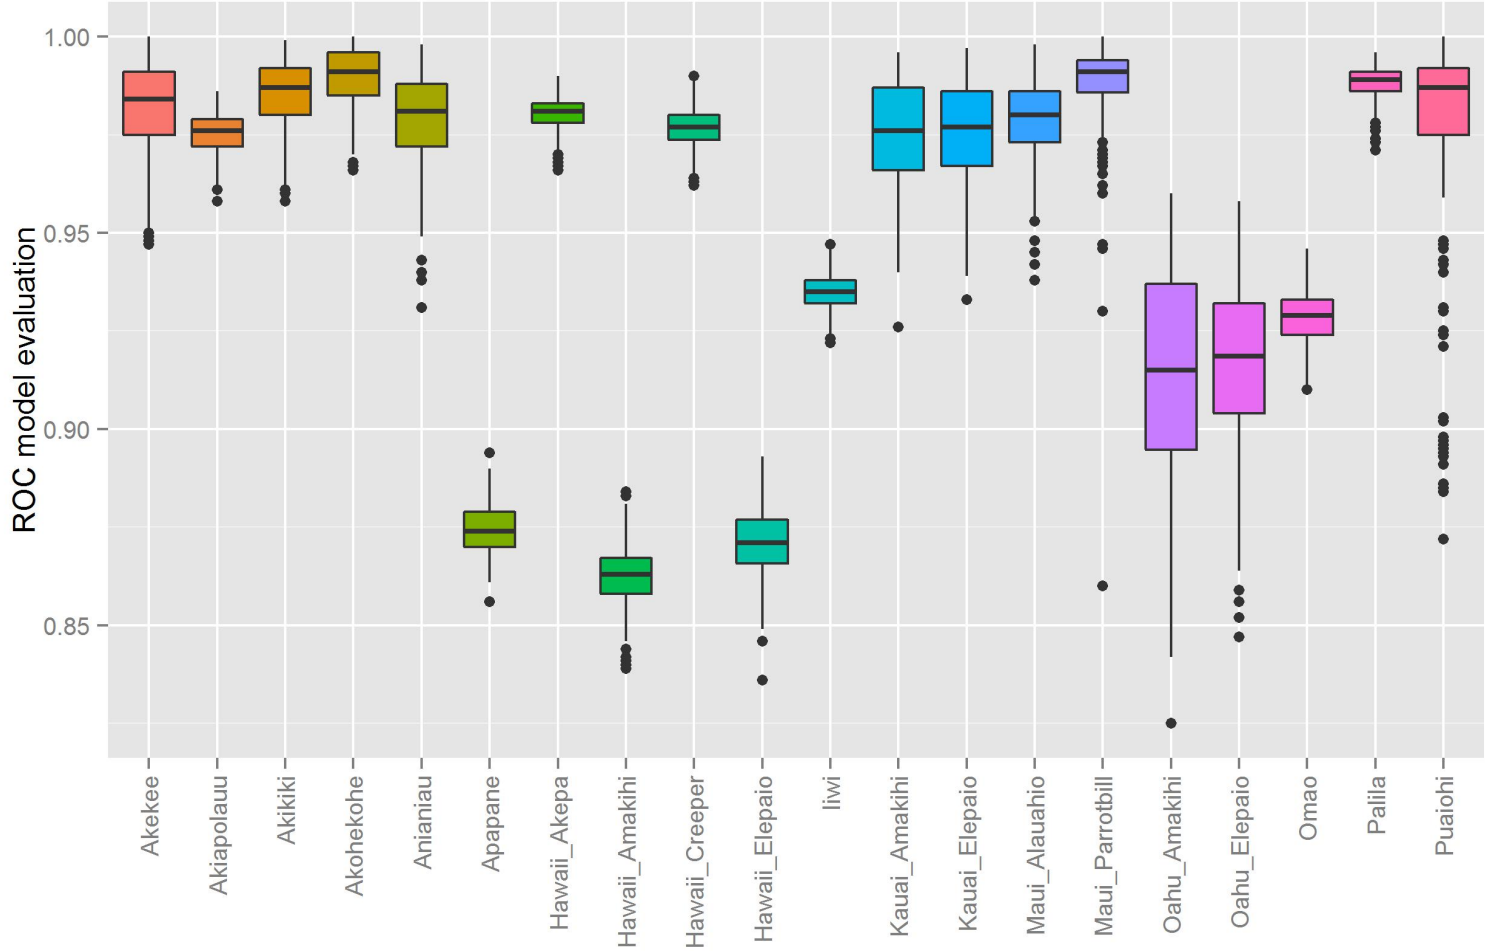

ROC MAXENT variable importance box plot

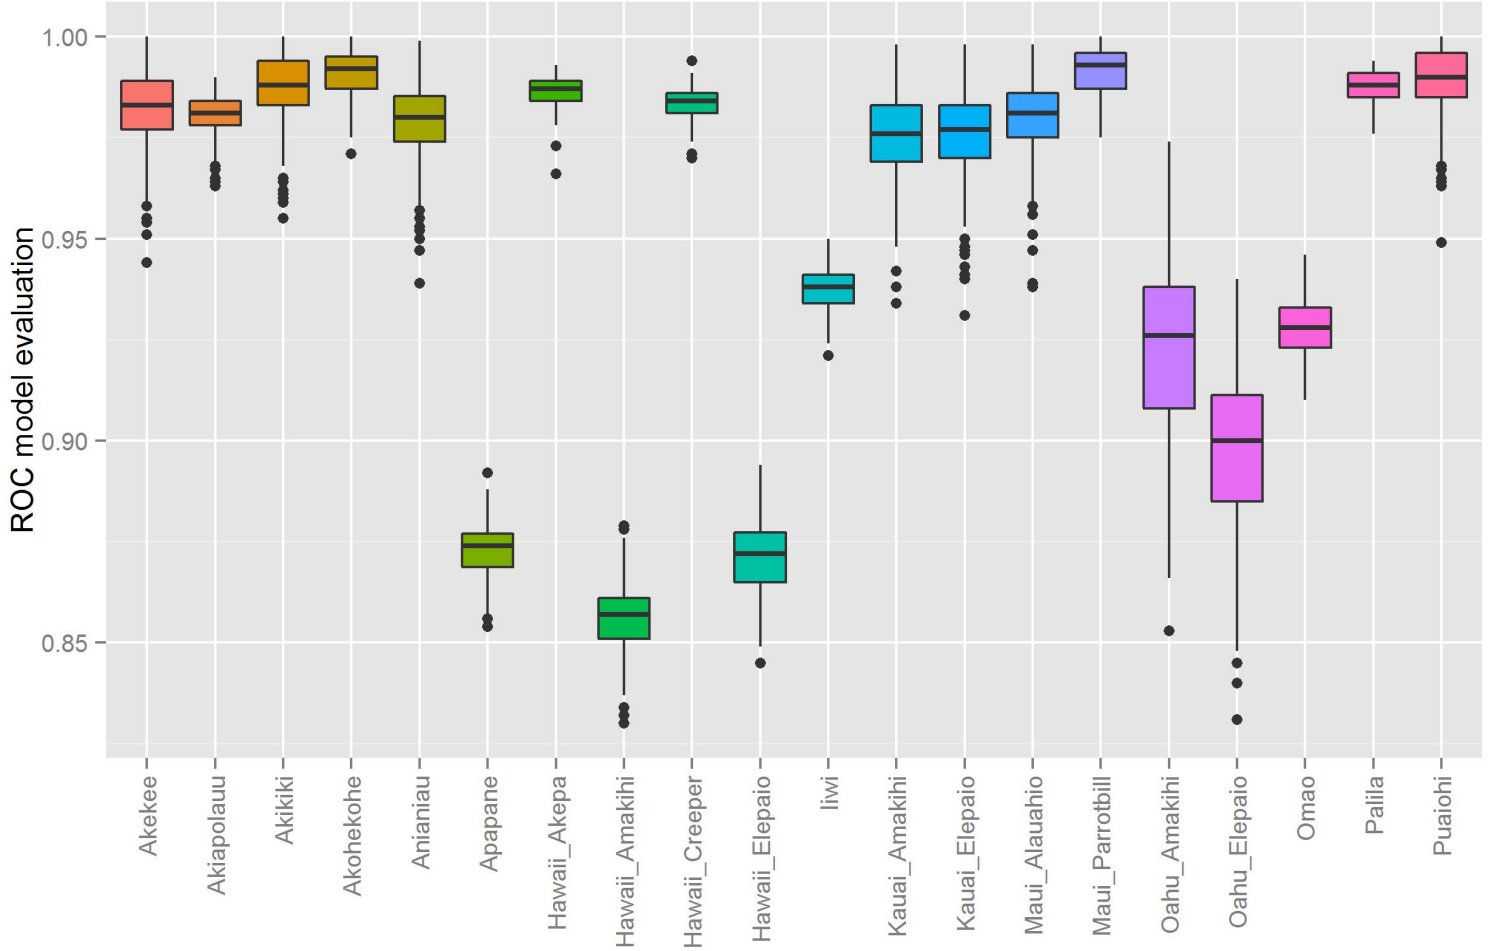

## TSS GBM variable importance box plot

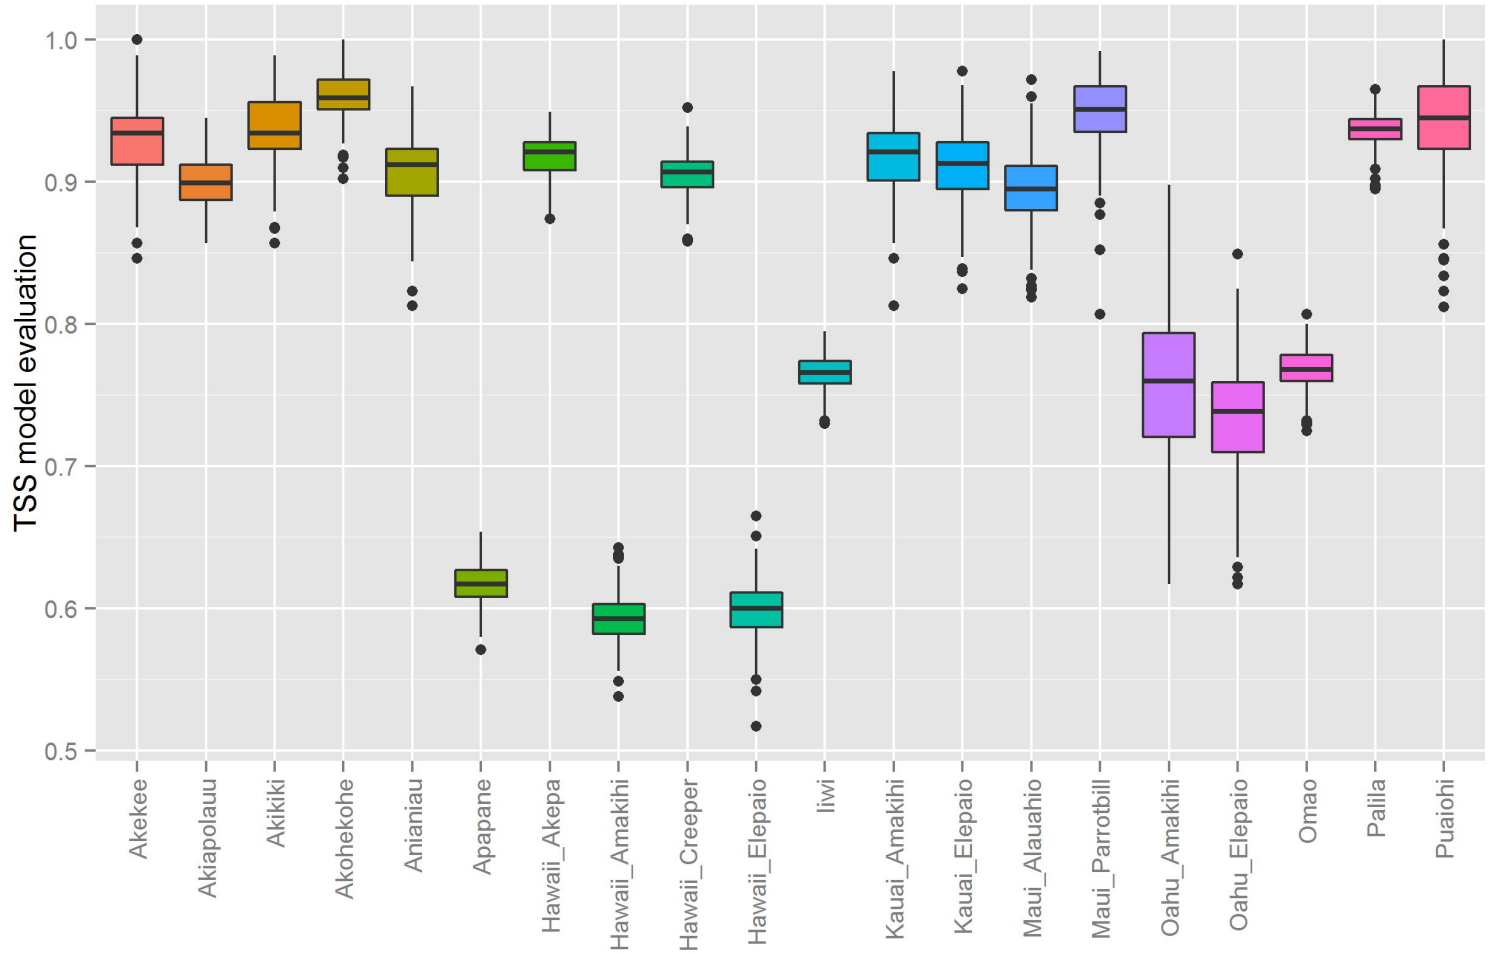

## TSS MAXENT variable importance box plot

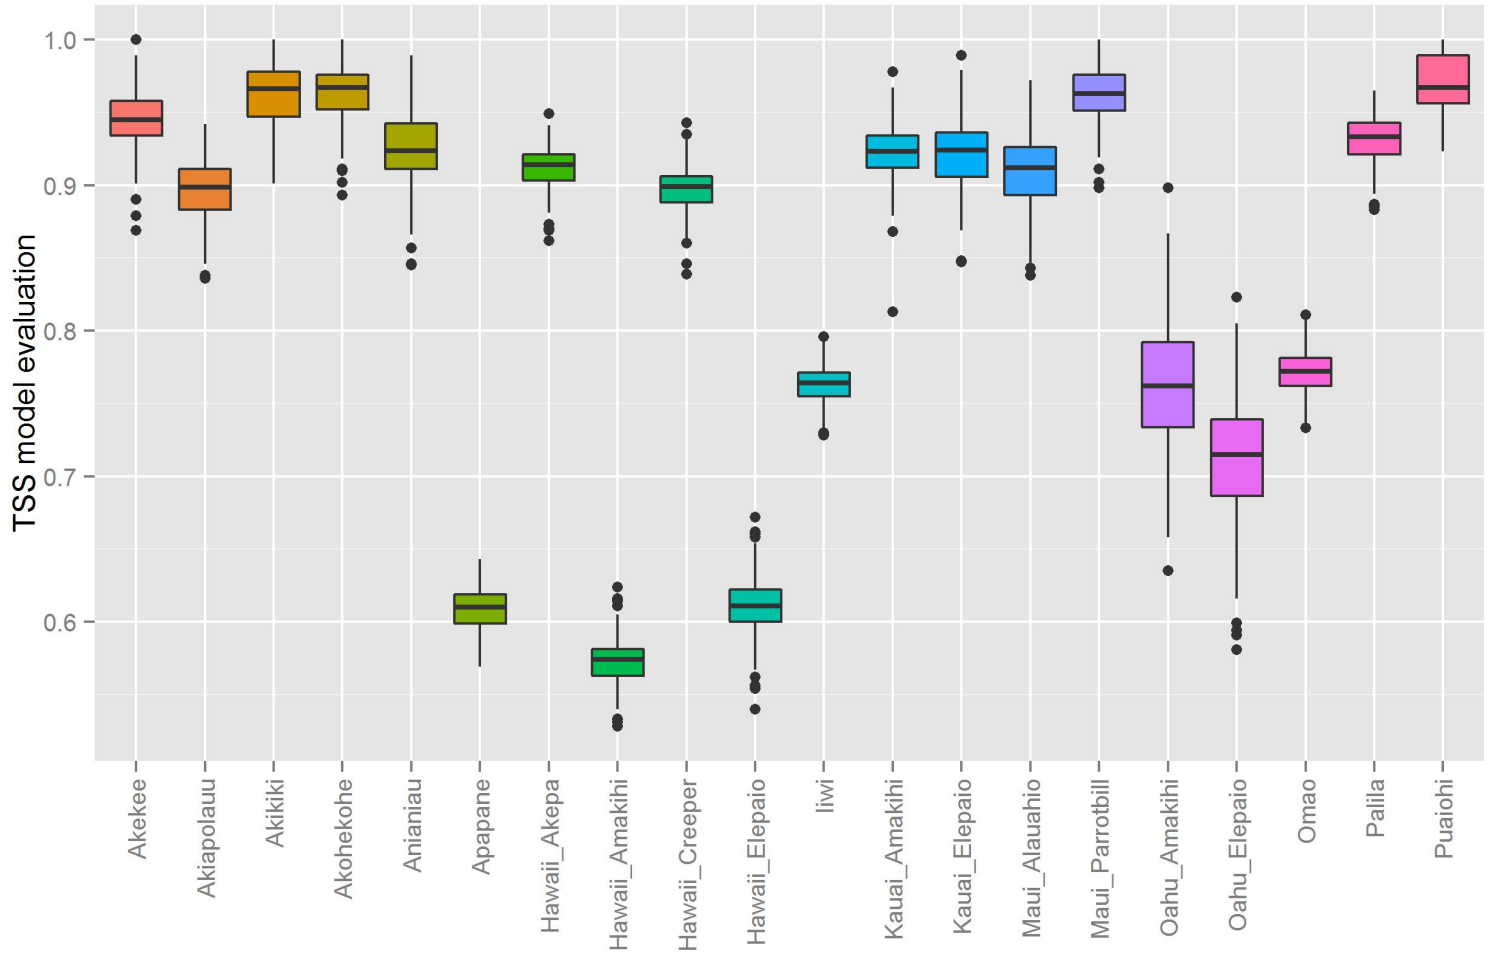

Supplement: pone.0140389.s002.pdf [file pone.0140389.s002.pdf]
