# Supplementary material for: Large-Scale Range Collapse of Hawaiian Forest Birds under Climate Change and the Need 21st Century Conservation Options
Source: PubMed Central journal article supplement (PMC4625087; doi:10.1371/journal.pone.0140389), 2015-10-28
Supplement: pone.0140389.s008.pdf [file pone.0140389.s008.pdf]

File S8. Projected changes between 1990-2010 and 2080-2100 in range for all Hawaiian forest bird species limited to current available primary habitat. All range estimates are in km<sup>2</sup>

| Species          | Overall model reliability | Baseline range | Future range | % range change | Range lost | Range kept | Range gained |
|------------------|---------------------------|----------------|--------------|----------------|------------|------------|--------------|
| `Akekee          | High                      | 70             | 0            | -100           | 70         | 0          | 0            |
| `Akiapōlā`au     | High                      | 397            | 87           | -78            | 381        | 16         | 71           |
| `Akikiki         | High                      | 52             | 0            | -100           | 52         | 0          | 0            |
| `Ākohekohe       | High                      | 44             | 4            | -92.1          | 41         | 4          | 0            |
| Hawai`i `Ākepa   | High                      | 422            | 28           | -93.4          | 404        | 19         | 10           |
| Hawai`i Creeper  | High                      | 582            | 134          | -76.9          | 468        | 114        | 21           |
| `Iwi             | High                      | 1852           | 743          | -59.9          | 1214       | 638        | 105          |
| Maui `Alauahio   | High                      | 102            | 26           | -74.9          | 76         | 26         | 0            |
| Maui Parrotbill  | High                      | 69             | 7            | -89.9          | 62         | 7          | 0            |
| Puaiohi          | High                      | 49             | 0            | -100           | 49         | 0          | 0            |
| `Anianiau        | Reduced                   | 77             | 4            | -94.8          | 73         | 4          | 0            |
| `Apapane         | Reduced                   | 2974           | 1708         | -42.6          | 1346       | 1628       | 81           |
| Hawai`i `Amakihi | Reduced                   | 2341           | 1037         | -55.7          | 1360       | 981        | 56           |
| Hawai`i `Elepaio | Reduced                   | 2395           | 1171         | -51.1          | 1410       | 985        | 186          |
| Kauai `Amakihi   | Reduced                   | 113            | 9            | -92            | 104        | 9          | 0            |
| Kauai `Elepaio   | Reduced                   | 116            | 7            | -93.9          | 109        | 7          | 0            |

|                |         |      |     |       |     |     |    |
|----------------|---------|------|-----|-------|-----|-----|----|
| O`ahu `Amakihi | Reduced | 257  | 27  | -89.6 | 230 | 27  | 0  |
| O`ahu `Elepaio | Reduced | 307  | 56  | -81.8 | 268 | 39  | 17 |
| `Oma`o         | Reduced | 1541 | 868 | -43.7 | 681 | 861 | 8  |
| Palila         | Reduced | 215  | 0   | -99.9 | 214 | 0   | 0  |
